# Supplementary material for: Effects of delivery via pressure-adjustable pneumatic gas-powered dart gun of three antimicrobial drugs (ceftiofur crystalline free acid, tildopirosin, and tulathromycin) on drug disposition and meat quality in cattle
Source: PeerJ. 2021 Aug 4;9:e11822. doi: 10.7717/peerj.11822 (PMC8349169; doi:10.7717/peerj.11822)
Supplement: Supplemental Information 1 — Weights are in pounds. [file peerj-09-11822-s001.xlsx]

## Sheet: Sheet2
Ref ID	VID	EID	GSPen	Trtment	Sire	2015-02-25	2015-03-13	2015-03-30	2015-04-06	2015-04-13	2015-04-20	2015-04-27	2015-05-04	2015-05-11	2015-05-18	2015-05-25	2015-06-01	2015-06-08	2015-06-29	2015-07-06	2015-07-13	2015-07-20	2015-07-27	2015-08-10	2015-08-24	2015-09-07
1	555	982000368985993	2	4	283Y	682	696	718	732	774	776	808	808	810	846	876	858	878	934	934	966	996	998	1060	1090	1110
2	559	982000368985837	2	1	259Y	644	664	710	724	750	746	782	794	816	826	840	842	840	906	914	924	936	942	994	1020	1035
3	567	982000368985788	2	3	297Y	626	604	612	640	670	688	704	708	724	736	752	734	740	822	812	828	858	856	922	948	970
4	569	982000368985876	3	3	028X	794	810	846	874	914	934	952	986	1000	1030	1040	1050	1030	1060	1110	1115	1150	1160	1205	1225	1255
5	571	982000368985887	4	2	297Y	606	608	580	618	660	660	678	666	692	728	726	716	736	802	794	792	826	838	886	914	936
6	582	982000368985782	3	4	259Y	556	622	580	610	642	656	682	690	706	730	752	720	712	774	768	790	830	818	856	890	896
7	588	982000368985767	3	1	297Y	600	608	610	638	672	674	696	694	710	718	730	716	734	752	750	782	798	808	850	868	894
8	594	982000368985909	2	4	109X	606	608	628	650	694	704	734	738	754	762	792	782	796	830	828	854	884	892	922	966	994
9	597	982000208234438	2	5	028X	760	768	796	826	870	888	892	916	922	944	950	956	948	1035	1040	1040	1065	1080	1120	1155	1180
10	598	982000368985983	3	4	297Y	654	660	700	724	762	756	752	764	788	830	852	840	846	910	910	922	952	974	1000	1055	1050
11	599	982000368985952	4	2	109X	582	598	600	616	636	656	662	676	684	712	714	722	724	794	784	770	786	794	810	828	856
12	601	982000368985959	4	1	028X	654	644	610	646	676	688	700	698	718	748	752	732	732
13	605	982000208234475	3	5	314Y	538	538	576	588	622	610	634	662	662	684	706	698	700	710	718	732	756	754	792	802	820
14	608	982000368985799	4	2	297Y	648	676	698	716	758	762	788	750	808	804	830	830	852	950	938	956	958	990	1045	1060	1100
15	609	982000368985912	3	4	028X	610	628	684	720	736	758	780	788	822	828	836	854	854	898	888	940	966	972	1000	1050	1080
16	610	982000368985793	2	4	297Y	600	574	570	594	626	646	668	682	692	716	746	744	758	824	854	874	890	896	944	988	1015
17	611	982000368985795	3	2	028X	718	752	788	808	836	852	852	860	878	906	910	896	910	974	1015	1010	1035	1020	1070	1120	1145
18	613	982000368985802	2	1	109X	668	696	728	742	774	790	834	812	852	854	884	878	894	894	884	930	960	948	978	982	1010
19	614	982000368985966	4	5	.	624	633	640	664	670	706	732	760	774	806	802	812	816	884	886	898	930	934	958	1010	1020
20	616	982000208234495	3	3	190Y	536	544	568	592	628	622	642	638	660	678	706	694	716	750		772	780	780	824	834	844
21	619	982000368985928	2	4	190Y	622	688	692	698	724	736	758	780	792	792	816	826	860	856	874	910	940	944	982	1025	1040
22	622	982000368985916	2	3	136X	778	774	790	818	864	866	890	908	946	972	972	976	974	1020	1010	1050	1080	1090	1145	1170	1205
23	623	982000368985927	3	5	.	610	622	638	658	706	714	712	738	736	760	780	792	778	826	860	852	884	888	932	960	996
24	625	982000368985765	2	2	286Y	618	634	650	672	722	724	744	748	778	804	812	822	834	868	870	868	890	884	906	912	928
25	628	982000368985896	4	1	190Y	670	664	654	680	712	738	762	764	798	818	824	832	862	924	944	936	990	992	1045	1055	1085
26	630	982000368985845	2	2	259Y	606	630	686	718	732	746	776	780	810	834	838	840	860	914	928	932	946	952	1010	1030	1070
27	631	982000368985962	3	1	136X	630	668	676	698	730	732	754	758	758	810	808	794	796	794	790	822	846	838	854	890	866
28	634	982000368985769	4	4	136X	536	546	564	584	612	604	644	648	652	682	702	702	714	768	766	770	802	822	860	886	928
29	637	982000368985773	4	3	259Y	590	580	564	582	614	620	646	666	674	688	694	706	720	792	782	804	790	820	878	916	954
30	638	982000368985944	4	2	136X	458	502	544	572	610	624	638	656	684	708	720	720	732	826	824	832	854	876	906	930	966
31	640	982000368985982	4	4	286Y	748	772	796	816	860	880	886	906	914	960	962	962	952	1015	984	1005	1030	1030	1055	1095	1130
32	645	982000368985908	3	2	190Y	560	572	574	620	656	676	710	728	758	794	812	820	836	900	944	982	980	1010	1042	1075	1120
33	646	982000368985977	3	3	286Y	604	638	670	666	724	728	748	758	784	798	818	820	834	880	876	906	920	924	960	984	1025
34	647	982000368985755	3	5	136X	710	716	762	778	812	812	848	844	890	916	912	912	892	900	916	924	946	948	982	968	998
35	649	982000368985981	4	1	286Y	606	650	648	666	694	700	714	722	742	754	772	772	780	794	810	812	842	848	850	850	874
36	650	982000368985894	3	5	286Y	624	640	692	710	742	752	770	784	810	846	842	832	850	890	920	944	970	952	1025	1045	1080
37	663	982000368985991	2	3	109X	596	608	628	668	684	692	736	736	754	756	778	762	750	818	830	862	872	854	900	932	968
38	664	982000368985875	2	1	283Y	762	806	844	870	906	918	964	956	972	990	1030	1000	1020	1070	1060	1090	1100	1140	1180	1225	1215
39	666	982000368985954	3	1	028X	560	582	616	628	660	672	694	698	722	750	758	766	790	814	816	814	854	850	906	930	962
40	669	982000368985818	2	5	109X	532	532	564	582	618	616	626	640	648	686	696	696	644	726	726	742	762	754	768	788	804
41	670	982000368985974	3	3	297Y	460	420	436	438	466	484	500	512	532	562	578	586	598	602	640	654	680	668	702	698	726
42	671	982000368985882	4	3	028X	660	676	716	734	770	754	802	820	840	860	878	870	888
43	672	982000208234287	4	3	283Y	610	628	684	730	750	752	776	770	800	820	846	840	834	934	916	932	962	948	996	1015	1010
44	676	982000368985764	2	5	297Y	474	514	538	568	596	594	618	630	652	662	686	692	704	744	760	794	800	812	840	884	920
45	677	982000368985897	2	2	028X	638	670	730	752	790	788	822	824	854	872	894	890	904	988	1000	1020	1040	1025	1080	1130	1150
46	679	982000368985758	3	5	297Y	676	702	728	744	782	792	818	832	848	878	888	888	866	962	970	988	1000	1010	1050	1080	1095
47	680	982000368985849	3	2	283Y	544	564	606	626	654	678	690	712	750	750	760	766	782	806	834	846	832	850	904	926	956
48	681	982000368985919	2	5	297Y	548	540	582	610	636	660	686	708	720	742	760	760	758	826	830	868	886	882	902	950	982
49	682	982000368985930	4	4	028X	724	694	698	728	764	776	796	792	822	836	866	844	868
50	684	982000368985950	2	5	283Y	688	678	638	654	672	696	712	724	734	768	792	784	764	828	862	872	892	884	932	958	1005
51	687	982000368985816	3	5	275Y	604	652	706	734	770	776	792	816	840	862	874	874	890	912	924	938	968	970	994	1010	1040
52	690	982000368985859	4	5	283Y	466	498	526	558	592	596	630	640	662	690	690	706	710	790	794	782	824	826	868	892	912
53	692	982000368985780	4	5	297Y	444	456	500	520	550	564	586	610	622	648	654	672	684	782	758	768	790	802	830	862	898
54	694	982000368985931	4	5	259Y	480	460	456	482	498	524	528	546	554	568	590	590	610	662	646	644	668	692	716	742	770
55	695	982000368985980	4	5	286Y	582	598	640	664	694	714	718	738	750	760	792	782	782	870	848	858	876	884	920	964	994
						weights in red not used due to scale malfunction
		removed from trial due to illness
	673	982000368985957	2	1	297Y	676	684	618	-	-	-	-	-	-	-	-	-	-
	685	982000368985988	4	5	297Y	550	522	474	-	-	-	-	-	-	-	-	-	-
