# Supplementary material for: Effects of delivery via pressure-adjustable pneumatic gas-powered dart gun of three antimicrobial drugs (ceftiofur crystalline free acid, tildopirosin, and tulathromycin) on drug disposition and meat quality in cattle
Source: PeerJ. 2021 Aug 4;9:e11822. doi: 10.7717/peerj.11822 (PMC8349169; doi:10.7717/peerj.11822)
Supplement: Supplemental Information 2 — “Carcass data” includes yield and quality grading data of steaks cut as described in the manuscript; “Cook data” includes steak characteristics; “WarnerBratzler Data” includes tenderness assessments for all steaks cut as described in the manuscript. [file peerj-09-11822-s002.xlsx]

## Sheet: Carcass Data
VID	EID	GSPen	Trtment	Name	Outcome	ID	EarTag	LiveWt	DP	Marb	Marb	QG	ActPYG	AdjPYG	Backfat	REA	REAAdj	HCW	HCWAdj	KPH	AKPHj	FYG	L1	L2	L3	LAve	a1	a2	a3	aAve	b1	b2	b3	bAve	Tag1	pH1	pH2	pHAve	Hump
638	982000368985944	4	2	CCFA	TANK	9	638	1053	64.34	Mt0	500	CH⁰	2.8	2.9	0.36	13.7	0.891	677.5	0.31	3	-0.1	2.219	42.42	44.84	46.37	44.5433	10.42	13.98	9.9	11.4333	4.95	6.88	5.23	5.68667	638	5.52	5.58	5.55	4.4
559	982000368985837	2	1	Saline	OK	37	559	1159	66.1777	Mt60	560	CH⁰	4.1	4.3	0.92	11.2	0.066	767	0.668	3	-0.1	4.802	43.86	41.19	43.42	42.8233	14.8	17.28	16.9	16.3267	7.54	8.47	8.09	8.03333	559	5.5	5.5	5.5	4
609	982000368985912	3	4	TILD	TANK	24	609	1120	67.2321	Sl10	310	SE-	3.5	3.6	0.64	13.3	0.759	753	0.612	2.5	-0.2	3.253	48.07	45.71	48.3	47.36	13.39	14.6	11.83	13.2733	6.65	7.23	5.35	6.41	609	5.47	5.56	5.515	4.2
613	982000368985802	2	1	Saline	OK	31	613	1093	63.0375	Sl30	330	SE-	2.7	2.7	0.28	13.5	0.825	689	0.356	2	-0.3	1.931	35.17	35.72	36.95	35.9467	14.9	14.84	15.7	15.1467	6.82	6.6	7.14	6.85333	613	5.68	5.68	5.68	4.13
631	982000368985962	3	1	Saline	OK	34	631	971	65.6025	Sl40	340	SE-	3	3	0.4	12.7	0.561	637	0.148	2	-0.3	2.287	37.73	43.01	40.26	40.3333	14.37	13.47	13.57	13.8033	7.02	6.55	6.37	6.64667	631	5.59	5.66	5.625	3.5
649	982000368985981	4	1	Saline	OK	38	649	962	65.3846	Sl40	340	SE-	3.3	3.4	0.56	13.7	0.891	629	0.116	2.5	-0.2	2.425	38.68	41.36	42.1	40.7133	16.58	14.06	13.9	14.8467	8.52	6.69	6.58	7.26333	649	5.58	5.5	5.54	4.75
616	982000208234495	3	3	TULA	TANK	13	616	924	66.342	Sl50	350	SE+	3.3	3.4	0.56	11.6	0.198	613	0.052	2	-0.3	2.954	41.35	41.78	43.35	42.16	16.49	16.02	14.7	15.7367	8.37	8.02	7.06	7.81667	616	5.51	5.52	5.515	3.5
640	982000368985982	4	4	TILD	TANK	1	640	1232	64.1234	Sl60	360	SE+	2.6	2.6	0.24	15.8	1.584	790	0.76	1.5	-0.4	1.376	45.52	48.55	47.31	47.1267	12.85	11.08	11.03	11.6533	5.94	5.38	4.84	5.38667	640	5.64	5.73	5.685	5.5
680	982000368985849	3	2	CCFA	TANK	25	680	1015	65.1232	Sl60	360	SE+	2.7	2.8	0.32	11.5	0.165	661	0.244	2	-0.3	2.579	46.65	41.7	40.28	42.8767	11.5	15.66	14.83	13.9967	4.89	7.15	6.91	6.31667	680	5.58	5.54	5.56	4.3
582	982000368985782	3	4	TILD	TANK	12	582	969	67.0795	Sl70	370	SE+	2.8	3	0.4	12.3	0.429	650	0.2	2	-0.3	2.471	41.5	45.49	44.34	43.7767	12.49	14.14	15.44	14.0233	5.78	7.09	7.34	6.73667	582	5.52	5.53	5.525	3.8
610	982000368985793	2	4	TILD	TANK	27	610	1055	66.3033	Sl80	380	SE+	2.8	2.9	0.36	14.1	1.023	699.5	0.398	2.5	-0.2	2.075	42.86	43.05	38.6	41.5033	9.96	11.69	12.89	11.5133	3.88	4.82	5.54	4.74667	610	5.62	5.62	5.62	4
666	982000368985954	3	1	Saline	OK	36	666	1059	64.9669	Sl80	380	SE+	3	3	0.4	11.6	0.198	688	0.352	2.5	-0.2	2.954	41.9	41.65	38.44	40.6633	15.59	13.51	17	15.3667	8.08	6.4	8.48	7.65333	666	5.5	5.54	5.52	4.875
682	982000368985930	4	4	TILD	TANK	5	682	1093	62.946	Sl80	380	SE+	3.5	3.7	0.68	14.8	1.254	688	0.352	2	-0.3	2.498	44.11	49.46	45.78	46.45	17.06	12.3	14	14.4533	8.76	6.25	7	7.33667	682	5.59	5.57	5.58	5
677	982000368985897	2	2	CCFA	TANK	30	677	1226	67.1289	Sl80	380	SE+	3.4	3.6	0.64	13.7	0.891	823	0.892	2	-0.3	3.301	43.45	45.75	50	46.4	14.34	11.89	12.04	12.7567	6.69	5.4	5.91	6	677	5.5	5.52	5.51	5
670	982000368985974	3	3	TULA	TANK	23	670	800	63.25	Sl90	390	SE+	2.5	2.6	0.24	10.7	-0.099	506	-0.376	2	-0.3	2.023	45.78	46.29	43.63	45.2333	11.13	12.87	13.99	12.6633	4.72	5.87	6.26	5.61667	670	5.61	5.57	5.59	3
571	982000368985887	4	2	CCFA	TANK	11	571	1040	64.8077	Sm0	400	CH-	3.1	3.3	0.52	13	0.66	674	0.296	2.5	-0.2	2.736	42.93	42.14	40.11	41.7267	16.86	17.7	16.78	17.1133	8.43	8.59	8.36	8.46	571	5.86	5.57	5.715	2.8
611	982000368985795	3	2	CCFA	TANK	4	611	1210	69.3388	Sm0	400	CH-	4	4	0.8	14.2	1.056	839	0.956	2.5	-0.2	3.7	49.51	43.71	44.25	45.8233	13.27	15.09	13.55	13.97	7.42	7.98	6.63	7.34333	NT	5.51	5.48	5.495	4.8
622	982000368985916	2	3	TULA	TANK	28	622	1235	66.2753	Sm0	400	CH-	3.3	3.3	0.52	13.6	0.858	818.5	0.874	3	-0.1	3.216	47.03	42.66	43.77	44.4867	12.92	16.35	14.65	14.64	6.12	7.88	6.64	6.88	622	5.51	5.57	5.54	4.3
599	982000368985952	4	2	CCFA	TANK	15	599	923	64.5179	Sm10	410	SE+	2.6	2.7	0.28	11.8	0.264	595.5	-0.018	2	-0.3	2.118	42.56	45.65	41.61	43.2733	11.11	12.68	13.7	12.4967	4.86	5.67	6.32	5.61667	634	5.72	5.76	5.74	3.5
608	982000368985799	4	2	CCFA	TANK	2	608	1180	67.5424	Sm10	410	CH-	4.1	4.2	0.88	13.9	0.957	797	0.788	2.5	-0.2	3.831	41.97	44.55	40.84	42.4533	21.09	20.48	18.17	19.9133	11.31	11.64	9.11	10.6867	608	5.44	5.45	5.445	4
628	982000368985896	4	1	Saline	OK	33	628	1173	63.5124	Sm10	410	CH-	4.3	4.4	0.96	13	0.66	745	0.58	2	-0.3	4.02	38.33	40.08	39.75	39.3867	19.17	17.3	13.91	16.7933	9.96	8.42	6.53	8.30333	628	5.5	5.52	5.51	5
588	982000368985767	3	1	Saline	OK	35	588	1022	62.4266	Sm20	420	CH-	2.8	3	0.4	12.9	0.627	638	0.152	2	-0.3	2.225	40.9	40.7	41.42	41.0067	14.59	13.64	12.67	13.6333	6.71	5.86	5.63	6.06667	588	5.59	5.62	5.605	5
619	982000368985928	2	4	TILD	TANK	26	619	1098	66.3934	Sm20	420	CH-	3.7	3.9	0.76	11.6	0.198	729	0.516	3	-0.1	4.118	42.45	43.92	39.58	41.9833	14.37	13.15	13.39	13.6367	7.01	5.92	6.11	6.34667	619	5.66	5.53	5.595	4.8
671	982000368985882	4	3	TULA	TANK	3	671	1200	65.0417	Sm20	420	CH-	3.3	3.4	0.56	13.5	0.825	780.5	0.722	2.5	-0.2	3.097	46.91	44.88	49.66	47.15	11.95	13.69	12.2	12.6133	5.71	6.63	6.75	6.36333	671	5.55	5.53	5.54	5.3
555	982000368985993	2	4	TILD	TANK	21	555	1160	69.0948	Sm30	430	CH-	3.8	3.9	0.76	12.3	0.429	801.5	0.806	3	-0.1	4.177	44.55	43.52	44.01	44.0267	16.72	17.77	16.29	16.9267	8.33	9.01	7.9	8.41333	555	5.52	5.49	5.505	4.7
637	982000368985773	4	3	TULA	TANK	7	637	1040	66.4423	Sm30	430	CH-	3	3.2	0.48	13.5	0.825	691	0.364	2	-0.3	2.439	44.89	44.72	41.84	43.8167	16.32	14.41	14.52	15.0833	8.28	7.23	7.09	7.53333	637	5.55	5.57	5.56	4.4
663	982000368985991	2	3	TULA	TANK	22	663	1018	65.5206	Sm40	440	CH-	3	2.9	0.36	11.4	0.132	667	0.268	3	-0.1	2.936	42.35	44.39	43.74	43.4933	16.79	14.7	15.24	15.5767	8.25	6.88	7.39	7.50667	663	5.55	5.48	5.515	4.3
594	982000368985909	2	4	TILD	TANK	20	594	1070	66.5421	Sm50	450	CH-	3	3.2	0.48	12.1	0.363	712	0.448	2.5	-0.2	3.085	45.74	42.17	45.18	44.3633	12.77	14.96	12.53	13.42	5.44	7.01	5.56	6.00333	594	5.69	5.52	5.605	4.4
630	982000368985845	2	2	CCFA	TANK	29	630	1114	68.088	Sm50	450	CH-	3.4	3.6	0.64	11.8	0.264	758.5	0.634	2	-0.3	3.67	43.49	43.75	47.29	44.8433	16.81	15.61	12.28	14.9	8.59	8.09	5.92	7.53333	630	5.47	5.44	5.455	4.5
567	982000368985788	2	3	TULA	TANK	18	567	1050	67.9048	Sm60	460	CH-	4.1	4.3	0.92	14.2	1.056	713	0.452	2	-0.3	3.396	45.62	46.87	48.7	47.0633	14.25	16.36	13.08	14.5633	6.72	8.26	6.5	7.16	567	5.52	5.5	5.51	4.6
672	982000208234287	4	3	TULA	TANK	6	672	1098	63.5701	Sm60	460	CH-	3.4	3.6	0.64	12.5	0.495	698	0.392	2	-0.3	3.197	44.73	49.57	47.73	47.3433	17.28	11.98	12.35	13.87	9.46	6.06	6.59	7.37	672	5.54	5.52	5.53	4.3
598	982000368985983	3	4	TILD	TANK	10	598	1100	70.9091	Sm70	470	CH-	4	4.3	0.92	12.8	0.594	780	0.72	2.5	-0.2	4.226	41.31	44.74	43.98	43.3433	10.53	11.87	11.14	11.18	4.63	5.49	4.94	5.02	598	5.73	5.83	5.78	3.7
634	982000368985769	4	4	TILD	TANK	14	634	978	66.7689	Sm70	470	CH-	3	3.1	0.44	15.1	1.353	653	0.212	2	-0.3	1.659	46.6	45.65	41.9	44.7167	11.75	12.79	12.38	12.3067	5.73	6.63	6.08	6.14667	599	5.6	5.53	5.565	4.3
569	982000368985876	3	3	TULA	TANK	8	569	1296	67.3611	Sm80	480	CH-	4.3	4.6	1.04	14	0.99	873	1.092	2.5	-0.2	4.502	42.26	44.97	42.71	43.3133	17.43	14.72	14.23	15.46	8.53	6.98	6.8	7.43667	569	5.54	5.5	5.52	3.8
646	982000368985977	3	3	TULA	TANK	16	646	1110	66.4865	Sm80	480	CH-	3.4	3.6	0.64	12.2	0.396	738	0.552	2.5	-0.2	3.556	45.55	48.24	47.73	47.1733	16.88	12.53	12.81	14.0733	8.65	5.92	5.93	6.83333	646	5.41	5.48	5.445	4.7
664	982000368985875	2	1	Saline	OK	32	664	1305	65.5939	Sm80	480	CH-	3.1	3.3	0.52	14	0.99	856	1.024	3	-0.1	3.234	37.69	38.82	41.95	39.4867	18.69	16.93	15.22	16.9467	9.33	8.33	7.43	8.36333	664	5.49	5.47	5.48	4.75
625	982000368985765	2	2	CCFA	TANK	19	625	1001	64.8851	Sm90	490	CH-	2.8	3	0.4	11.6	0.198	649.5	0.198	2	-0.3	2.7	48.18	47.51	46.09	47.26	13.58	15.29	16.96	15.2767	6.51	7.87	8.98	7.78667	625	5.58	5.51	5.545	4
645	982000368985908	3	2	CCFA	TANK	17	645	1207	65.2858	Tr90	290	ST+	2.5	2.7	0.28	15.2	1.386	788	0.752	1.5	-0.4	1.666	42.71	43.77	43.7	43.3933	10.01	10.8	13.48	11.43	4.09	4.68	6.5	5.09	645	5.76	5.65	5.705	6.4

## Sheet: Cook Data
Tag #	Code	Cut	Position	IntWt	FinalWt	CookLoss	CookYield	TimeOn	TimeOff	CookTime	TempOn	TempOff
1	186	Round	Right	395.6	346.2	12.4874	87.5126	13.2	13.3	10	14.4	70.2
1	309	Round	Dart	385.1	306.8	20.3324	79.6676	12.24	12.48	24	12.6	70
1	361	Round	Prox2	302.4	243.3	19.5437	80.4563	13.13	13.29	16	13.7	71.3
1	397	Round	Dist2	417.6	325.7	22.0067	77.9933	12.22	12.44	22	10.9	70
1	450	Round	Dist1	425.8	351.3	17.4965	82.5035	13.07	13.25	18	8.6	70
1	455	Loin	4	321.35	294.45	8.37094	91.6291	12.21	12.32	11	11.9	73.6
1	469	Loin	2	292.65	219.1	25.1324	74.8676	8.42	9.01	19	8.5	70
1	562	Round	Prox1	399.5	318.85	20.1877	79.8123	12.25	12.51	26	7.6	70
1	629	Loin	1	268.5	232.25	13.5009	86.4991	9.5	10	10	3	80
1	918	Loin	3	230.75	194.15	15.8613	84.1387	10.17	10.27	10	10.5	80
2	103	Loin	4	338.75	299.65	11.5424	88.4576	10.17	10.32	15	1.4	70.1
2	161	Round	Prox1	514.55	423.05	17.7825	82.2175	11.36	11.56	20	3.1	70
2	449	Loin	1	347.8	321.1	7.67683	92.3232	10.01	10.13	12	3.3	70.5
2	555	Round	Dist2	568.9	405.45	28.7309	71.2691	12.5	13.18	28	14	70
2	596	Round	Right	509	441.5	12.0825	87.9175	11.31	11.45	14	4.2	70
2	627	Loin	2	267.4	226.35	15.3515	84.6485	8.39	8.5	11	12.6	70
2	853	Round	Prox2	384.95	327.5	14.924	85.076	12.4	12.53	13	12.5	70.1
2	908	Round	Dart	488.3	385.6	21.0322	78.9678	12.35	12.55	20	12.7	70.4
2	921	Loin	3	306.15	239	21.9337	78.0663	12	12.18	18	6.7	70
2	924	Round	Dist1	537.85	480.5	10.6628	89.3372	11.33	11.45	12	7.8	70
3	273	Round	Dist1	491.15	374.9	23.6689	76.3311	8.42	9.15	73	6.2	70
3	321	Round	Prox1	356.45	285.7	19.8485	80.1515	8.43	9.07	24	11.1	70.1
3	389	Round	Prox2	370.65	313.5	15.4189	84.5811	8.48	9.08	20	11.9	71.8
3	491	Loin	2	314.35	232.85	25.9265	74.0735	8.24	8.42	18	7	72.5
3	528	Round	Dist2	468.3	378.25	19.2291	80.7709	10.09	10.31	22	14.2	70
3	623	Round	Dart	352.3	297.95	15.4272	84.5728	8.52	9.1	18	12.3	70
3	666	Round	Right	295.35	263.85	10.6653	89.3347	8.47	8.55	8	13.9	70
3	794	Loin	1	336.7	296.9	11.8206	88.1794	11.57	12.1	13	8	70
3	848	Loin	4	377.4	311.3	17.5146	82.4854	10.39	10.59	20	4.4	70
3	869	Loin	3	357.3	283.4	20.6829	79.3171	10.1	10.29	19	1.6	71.5
4	324	Loin	2	336.45	295.9	12.0523	87.9477	10.32	10.45	13	10.7	70.2
4	364	Loin	4	451.05	385.05	14.6325	85.3675	12.12	12.28	16	8.5	70
4	374	Loin	3	485.85	408.55	15.9103	84.0897	8.23	8.46	23	2.3	72
4	544	Round	Dist1	512	410.2	19.8828	80.1172	12.06	12.32	26	1.7	70
4	685	Round	Dist2	435.8	371.65	14.7201	85.2799	12.06	12.23	17	4.9	70
4	695	Round	Dart	388.45	321.2	17.3124	82.6876	12.05	12.23	18	12	70.1
4	768	Round	Right	506.45	350.55	30.7829	69.2171	12.11	12.51	40	2.4	71.1
4	798	Round	Prox1	535.1	460.5	13.9413	86.0587	12.16	12.38	22	2	70.1
4	883	Round	Prox2	586.25	503.2	14.1663	85.8337	12.11	12.34	23	0.1	70
4	998	Loin	1	356.5	318.5	10.6592	89.3408	10.09	10.22	13	0.9	70
5	113	Round	Dist2	533.6	393.45	26.265	73.735	10.14	10.45	31	6.3	70
5	166	Round	Dist1	467.35	391.05	16.3261	83.6739	9.16	9.37	21	15.8	70
5	315	Round	Dart	409.8	359.35	12.3109	87.6891	10.02	10.18	16	13.2	70
5	370	Loin	2	429	325.65	24.0909	75.9091	11.43	12.14	31	1	70
5	651	Round	Right	492.05	412.25	16.2179	83.7821	9.59	10.21	22	10.1	70.9
5	811	Loin	3	398.1	306.75	22.9465	77.0535	10.09	10.37	28	0.2	70
5	841	Loin	1	368.55	327.95	11.0161	88.9839	10.06	10.19	13	0.1	70
5	901	Round	Prox2	426.6	369.75	13.3263	86.6737	10.12	10.27	15	16.1	70.4
5	945	Round	Prox1	404.5	328.4	18.8133	81.1867	8.57	9.21	24	15.1	70
5	975	Loin	4	324.25	266.55	17.7949	82.2051	8.51	9.08	17	8.1	70.5
6	190	Loin	4	337.3	270.3	19.8636	80.1364	8.23	8.42	19	3.8	70
6	218	Round	Dist2	651.05	546.6	16.0433	83.9567	9.24	9.43	19	14.4	71
6	230	Round	Dart	439.35	381.1	13.2582	86.7418	10.46	11.09	23	4	70.1
6	319	Loin	3	337.35	283.75	15.8885	84.1115	10.01	10.16	15	4.1	72
6	357	Round	Prox2	291.95	229.3	21.4592	78.5408	9.24	9.51	27	15.1	70.6
6	525	Round	Dist1	572.5	469.65	17.9651	82.0349	9.32	9.58	26	13.4	70
6	663	Loin	2	329.85	283.8	13.9609	86.0391	10.25	10.42	17	3.3	70.1
6	772	Loin	1	320	263.35	17.7031	82.2969	12.16	12.33	17	8.8	70.2
6	838	Round	Right	431.45	365.65	15.2509	84.7491	10.38	11.01	23	2.8	70.7
6	926	Round	Prox1	388.05	309.1	20.3453	79.6547	9.25	9.51	26	12.1	70
7	169	Loin	4	311.35	256	17.7774	82.2226	10.12	10.28	16	1	70.7
7	286	Loin	1	558.8	434.5	22.2441	77.7559	12.01	12.3	29	1.6	70
7	312	Round	Dart	439.25	371.85	15.3443	84.6557	9.29	9.5	21	14.6	70
7	318	Round	Prox2	363.9	302.55	16.859	83.141	10.14	10.37	23	15.1	70.3
7	382	Round	Dist2	474.3	330.05	30.4132	69.5868	9.3	10.08	38	15.4	71.1
7	506	Loin	2	437.55	351.2	19.7349	80.2651	10.24	10.48	24	2.1	70.6
7	773	Loin	3	375.2	314.95	16.0581	83.9419	8.24	8.4	16	9.8	70
7	850	Round	Right	398.7	333.2	16.4284	83.5716	10.46	11.06	20	7.4	70.1
7	895	Round	Prox1	368.05	294	20.1195	79.8805	9.31	10.01	30	13.7	70
7	960	Round	Dist1	440.85	382.65	13.2018	86.7982	10.01	10.14	13	12.8	70
8	105	Round	Right	615.35	482.45	21.5975	78.4025	13.11	13.38	27	7.1	70
8	360	Round	Dist2	609.1	456.2	25.1026	74.8974	13.14	13.39	25	7.3	70.8
8	420	Round	Dart	474.3	408.1	13.9574	86.0426	13.2	13.39	19	10	70.1
8	459	Loin	4	329.1	276.45	15.9982	84.0018	10.32	10.51	19	0.1	70.2
8	550	Loin	3	352.2	295.75	16.0278	83.9722	8.23	8.38	15	7.9	70.3
8	576	Loin	1	424	343.55	18.9741	81.0259	9.54	10.14	20	0.2	71
8	746	Loin	2	345.55	297	14.0501	85.9499	11.5	12.05	15	6.1	70
8	765	Round	Prox2	432.2	357.5	17.2837	82.7163	11.35	12.03	28	1.1	70
8	767	Round	Dist1	574.7	498.35	13.2852	86.7148	9.12	9.31	19	12.2	70
8	969	Round	Prox1	531.5	451.25	15.0988	84.9012	13	13.24	24	4.2	70.5
9	122	Loin	2	353.15	296.7	15.9847	84.0153	10.18	10.35	17	0.4	70.5
9	185	Round	Right	417.35	357.8	14.2686	85.7314	9.38	9.52	14	15.2	70
9	208	Loin	3	356.8	297.85	16.5219	83.4781	9.29	9.49	20	0	70
9	297	Round	Dist1	402.25	368.6	8.36544	91.6346	11.02	11.16	14	11.6	71.1
9	303	Round	Prox1	376.65	326.7	13.2616	86.7384	13.2	13.38	18	9.3	70
9	381	Loin	1	400.8	332.75	16.9785	83.0215	8.25	8.49	24	2	70
9	530	Round	Prox2	353.55	295.85	16.3202	83.6798	8.49	9.11	22	11.3	70
9	833	Round	Dist2	403.15	357	11.4474	88.5526	11.39	11.55	16	6.8	70
9	840	Loin	4	348.85	295.2	15.3791	84.6209	12.15	12.32	17	7.6	71
9	940	Round	Dart	353.9	311.2	12.0656	87.9344	10.53	11.09	16	12.6	70.4
10	134	Loin	4	347.75	309.15	11.0999	88.9001	9.38	9.49	11	2.7	70
10	158	Round	Dist1	436.6	347.1	20.4993	79.5007	13.05	13.29	24	1.9	70
10	368	Round	Prox2	314.8	260.8	17.1537	82.8463	10	10.14	14	13.6	70
10	371	Round	Dart	304.4	269.55	11.4488	88.5512	13.2	13.32	12	11.1	70
10	588	Loin	1	355.45	291	18.1319	81.8681	10.29	10.49	20	1.2	70
10	650	Loin	2	293.7	268.65	8.52911	91.4709	12.42	12.52	10	12.2	84
10	672	Round	Prox1	285.8	245.25	14.1882	85.8118	9.52	10.05	13	12.9	70
10	761	Round	Dist2	470.8	387.05	17.7889	82.2111	10.47	11.09	22	10.3	70
10	859	Round	Right	330.35	276.55	16.2858	83.7142	12.16	12.36	20	2.6	70
10	870	Loin	3	387.2	289.3	25.2841	74.7159	8.44	9.1	26	6.1	70
11	540	Loin	4	419.7	344.55	17.9056	82.0944	12.28	12.47	19	10.1	70.1
11	558	Loin	1	424.05	321.65	24.1481	75.8519	9.29	9.59	30	1.3	70.3
11	578	Round	Dist2	534.6	393.45	26.4029	73.5971	9.16	9.59	43	14.8	74
11	753	Round	Dist1	521.65	391.85	24.8826	75.1174	9.21	9.54	33	14.7	70
11	823	Round	Prox2	363.65	310.55	14.602	85.398	8.47	9.04	17	11.1	70
11	858	Round	Dart	415.35	340.8	17.9487	82.0513	10.01	10.22	21	12	70
11	864	Loin	2	340.05	237.85	30.0544	69.9456	10.05	10.38	33	7.5	77
11	876	Round	Prox1	386.8	327.7	15.2792	84.7208	9.53	10.1	17	12.6	70.2
11	930	Round	Right	468.8	390.35	16.7342	83.2658	9.52	10.13	21	5.7	71.5
11	986	Loin	3	375.75	303.35	19.2681	80.7319	8.38	8.57	19	1.1	70.2
12	196	Loin	1	359	275.95	23.1337	76.8663	12.19	12.45	26	11.6	70
12	206	Round	Dist2	469.25	397.45	15.301	84.699	10.07	10.23	16	8.6	70.1
12	330	Round	Prox2	291.15	247.75	14.9064	85.0936	8.44	9	16	9.6	70
12	500	Loin	3	327.7	241.3	26.3656	73.6344	9.29	9.59	30	7.1	71
12	511	Loin	2	331.9	277.25	16.4658	83.5342	9.05	9.23	18	11	70.1
12	575	Loin	4	290.7	245.35	15.6003	84.3997	10.37	10.54	17	1.4	70
12	636	Round	Right	446.85	380.95	14.7477	85.2523	10.59	11.19	20	12.2	70.1
12	654	Round	Dart	314.4	276.9	11.9275	88.0725	10.5	11.03	13	12.3	70
12	683	Round	Dist1	526.25	439.55	16.4751	83.5249	11.07	11.37	30	5.4	70
12	813	Round	Prox1	346.05	303.15	12.3971	87.6029	9.02	9.2	18	15.1	70
13	207	Round	Dart	421.15	337.3	19.8955	80.1045	11.03	11.29	26	12.7	70
13	226	Loin	2	322.5	254.95	20.9457	79.0543	8.41	9.01	20	7	70
13	229	Round	Prox2	320.6	250.25	21.9432	78.0568	10.17	10.36	19	14.5	70.2
13	498	Round	Right	505	424.85	15.8713	84.1287	10.59	11.23	24	11.5	70.2
13	703	Loin	3	309.2	268.4	13.1953	86.8047	10.28	10.48	20	1.3	70.4
13	723	Loin	1	305.35	268	12.2319	87.7681	9.55	10.11	16	0.9	70
13	725	Round	Dist2	510.7	427	16.3893	83.6107	10.56	11.15	19	7.2	70
13	728	Round	Dist1	471.05	354.65	24.7108	75.2892	9.59	10.31	32	0.6	70.4
13	860	Round	Prox1	348.8	278.55	20.1405	79.8595	9.06	9.29	23	15.2	70.2
13	988	Loin	4	270.6	231.35	14.5048	85.4952	12.11	12.23	12	11.9	70
14	249	Loin	2	324.5	276.4	14.8228	85.1772	8.28	8.43	15	5.1	70
14	262	Round	Dist2	505.8	396.8	21.55	78.45	11.35	12.1	35	0.7	70
14	379	Round	Prox1	344	247.8	27.9651	72.0349	8.24	8.56	32	6.9	70
14	439	Loin	4	348	268.5	22.8448	77.1552	9.45	10.09	24	0.5	80.2
14	593	Round	Dart	375.65	315.45	16.0256	83.9744	11.31	12	29	1.6	70
14	622	Round	Dist1	481.75	345.75	28.2304	71.7696	10.09	10.52	43	15.4	70.6
14	633	Loin	3	319.6	258	19.2741	80.7259	10.26	10.49	23	2.5	70.2
14	669	Loin	1	298.5	258.1	13.5343	86.4657	12.14	12.28	14	9.8	70
14	743	Round	Prox2	329	236.35	28.1611	71.8389	10.02	10.44	42	14	71.5
14	898	Round	Right	395	323.25	18.1646	81.8354	11.35	11.56	21	6.5	70
15	283	Round	Dart	399.4	283.15	29.1062	70.8938	10.03	10.44	41	14.5	71
15	385	Round	Dist1	466.6	414.6	11.1444	88.8556	9.44	10	16	12.7	70.6
15	515	Round	Right	462.3	366.95	20.6251	79.3749	11.4	12.14	34	0.3	70.2
15	534	Loin	2	427.85	365.1	14.6664	85.3336	11.58	12.23	25	3.2	70.2
15	639	Round	Prox1	431.45	369.15	14.4397	85.5603	8.25	8.45	20	7	70
15	656	Loin	1	414.4	356.6	13.9479	86.0521	10.38	10.58	20	1.8	72
15	710	Loin	4	303.05	243.25	19.7327	80.2673	9.3	9.48	18	1.7	70
15	750	Round	Prox2	402.2	338.2	15.9572	84.0428	11.4	12.04	24	2	70
15	791	Loin	3	353.25	288.1	18.443	81.557	8.24	8.51	27	0.7	70
15	822	Round	Dist2	444.75	349.65	21.3828	78.6172	10.19	10.44	25	16.6	70
16	106	Loin	1	280.15	231.7	17.2943	82.7057	10.59	11.15	16	3.2	91.5
16	139	Loin	3	325.7	282.95	13.1256	86.8744	9.11	9.24	13	6.9	70.3
16	353	Round	Right	474.45	404.4	14.7645	85.2355	10.4	10.56	16	13.1	72
16	358	Loin	4	324.05	272.35	15.9543	84.0457	11.55	12.09	14	9.8	70
16	444	Round	Dart	411.95	342.28	16.9122	83.0878	10.57	11.14	17	14.2	70
16	516	Round	Dist2	460.4	358.65	22.1003	77.8997	11.1	11.35	25	15.7	70
16	598	Round	Prox1	354.3	284.95	19.5738	80.4262	10.51	11.09	18	13.1	70
16	655	Round	Prox2	401.86	275.85	31.3567	68.6433	11	11.38	38	13.3	70.2
16	671	Loin	2	317.65	253.7	20.1322	79.8678	12.34	12.57	23	7.4	70
16	968	Round	Dist1	547.4	443.8	18.9258	81.0742	9.44	10.1	26	9.7	70
17	101	Round	Dist1	613.25	476.05	22.3726	77.6274	10.29	10.56	27	13.4	70
17	129	Loin	4	332.35	278.55	16.1878	83.8122	12.59	13.16	17	11.8	71.3
17	356	Loin	1	304.1	260.85	14.2223	85.7777	10.5	11.04	14	2.8	70.1
17	403	Round	Dart	547.9	415.2	24.2197	75.7803	11	11.28	28	14.1	70
17	437	Round	Dist2	625.2	520.3	16.7786	83.2214	10.11	10.32	21	12.9	70.2
17	495	Round	Right	585.9	504.4	13.9102	86.0898	10.57	11.15	18	11.3	70
17	547	Loin	2	210.1	182.5	13.1366	86.8634	9.16	9.22	6	9.5	70
17	638	Loin	3	371.2	280.55	24.4208	75.5792	11.18	11.46	28	1.6	70
17	795	Round	Prox1	540.15	415.3	23.1139	76.8861	10.17	10.45	28	11.5	70.1
17	875	Round	Prox2	441.75	323.5	26.7685	73.2315	9.47	10.14	27	7.2	70
18	142	Loin	1	329.25	296.75	9.87092	90.1291	8.54	9.04	10	0.9	70.2
18	256	Round	Prox2	508.9	391.4	23.089	76.911	10.11	10.36	25	13	70
18	317	Loin	3	410.25	321.25	21.6941	78.3059	10.5	11.17	27	1.7	74
18	674	Round	Dart	544.15	394.2	27.5567	72.4433	10.51	11.27	36	13.7	71
18	732	Loin	2	316.25	213.05	32.6324	67.3676	11.13	11.45	32	3.8	74
18	792	Round	Right	494.8	391.8	20.8165	79.1835	9.37	10.04	27	11.7	70
18	809	Loin	4	354	292.8	17.2881	82.7119	12.24	12.46	22	7	70.1
18	942	Round	Dist1	319.7	282.1	11.761	88.239	10.39	10.5	11	16.1	70.5
18	958	Round	Prox1	558.9	484.8	13.2582	86.7418	10.35	10.55	20	15.8	70
18	993	Round	Dist2	284.7	249.3	12.4341	87.5659	10.24	10.31	7	10.3	70
19	147	Round	Dart	357.9	286.4	19.9776	80.0224	9	9.19	19	10.3	70
19	152	Round	Dist2	510.75	429.65	15.8786	84.1214	10.4	10.58	18	11.6	70
19	261	Round	Dist1	402.05	354.05	11.9388	88.0612	10.39	10.52	13	13	70.6
19	351	Round	Prox2	397.45	323	18.7319	81.2681	10.53	11.09	16	14.2	70
19	401	Loin	2	377.05	316.1	16.165	83.835	11.25	11.47	22	6.1	70.1
19	535	Round	Prox1	406.85	334.85	17.6969	82.3031	10.41	10.58	17	12.1	70
19	548	Round	Right	436.05	379.05	13.0719	86.9281	10.51	11.05	14	13.6	70.3
19	590	Loin	3	317.35	253.1	20.2458	79.7542	13.05	13.29	24	13.7	70
19	688	Loin	1	268.7	235.45	12.3744	87.6256	10.52	11.06	14	0.1	71.5
19	987	Loin	4	275.8	238.65	13.4699	86.5301	8.52	9.09	17	6.8	70
20	111	Round	Prox2	337.6	281.35	16.6617	83.3383	10.13	10.28	15	16.6	74.9
20	228	Loin	4	316.65	269.95	14.7481	85.2519	12.22	12.39	17	3.8	70.1
20	325	Round	Dist2	444.5	345.85	22.1935	77.8065	11.1	11.39	29	15.7	70.7
20	477	Round	Prox1	398.95	316.4	20.6918	79.3082	10.59	11.24	25	15.2	70
20	686	Round	Right	406	337.8	16.798	83.202	11	11.17	17	15.1	70
20	769	Round	Dart	459	365.1	20.4575	79.5425	9.42	10.07	25	10.1	70.1
20	832	Round	Dist1	449.3	399.9	10.9949	89.0051	11.06	11.2	14	15.2	70.3
20	866	Loin	2	325.9	294.6	9.60417	90.3958	11.21	11.38	17	4.1	70
20	906	Loin	3	330.2	276	16.4143	83.5857	9.23	9.43	20	3.1	72.8
20	949	Loin	1	323.85	262	19.0983	80.9017	10.5	11.13	23	2.5	70.2
21	250	Loin	2	331.2	291	12.1377	87.8623	11.14	11.27	13	7	70.2
21	408	Round	Prox1	469.05	321.25	31.5105	68.4895	10.12	10.5	38	13	70
21	417	Round	Dart	497.05	414.7	16.5677	83.4323	10.46	11.09	23	14	70.2
21	458	Round	Right	543.85	430	20.9341	79.0659	10.14	10.37	23	13.7	70.1
21	701	Loin	1	445.45	369.5	17.0502	82.9498	12.46	13.13	67	9.3	70.3
21	855	Round	Dist2	522.8	396.5	24.1584	75.8416	8.22	8.49	27	9.1	70
21	922	Loin	3	350.1	287.3	17.9377	82.0623	9.08	9.26	18	0.3	70.5
21	923	Round	Prox2	408.25	340.1	16.6932	83.3068	9.56	10.16	20	13.4	70.4
21	953	Loin	4	365.65	317.5	13.1683	86.8317	10	10.16	16	1.8	71.2
21	973	Round	Dist1	506.35	428	15.4735	84.5265	10.12	10.33	21	14.2	72
22	233	Round	Prox1	436.2	366.55	15.9674	84.0326	10.39	10.59	20	13.8	70
22	518	Round	Dist2	565.85	506.3	10.524	89.476	8.23	8.41	18	11.4	70
22	711	Loin	4	250.9	201.75	19.5895	80.4105	11	11.17	17	3.1	72
22	764	Round	Dist1	621.15	512.8	17.4435	82.5565	8.23	8.49	26	6.2	70
22	779	Loin	1	257.25	215.4	16.2682	83.7318	12.53	13.07	14	7.6	70
22	877	Loin	3	314.9	297.8	5.4303	94.5697	9.16	9.26	10	3.5	70.2
22	882	Loin	2	274.55	275.2	-0.236751	100.237	11.06	11.29	23	0.2	70
22	932	Round	Right	511.3	430.15	15.8713	84.1287	10.33	10.58	25	0.8	70
22	955	Round	Dart	476.35	382.75	19.6494	80.3506	8.41	9.07	26	11.4	70
22	974	Round	Prox2	370.1	309.75	16.3064	83.6936	10.28	10.49	21	5.7	70
23	234	Round	Right	456.8	387.3	15.2145	84.7855	9.53	10.16	23	10.1	74
23	480	Loin	4	268.6	237.7	11.5041	88.4959	8.44	8.59	15	2	72
23	490	Round	Dart	366.2	314.15	14.2135	85.7865	8.4	8.59	19	11.1	70
23	543	Loin	1	284.05	242.65	14.5749	85.4251	11.14	11.37	23	2.1	70.9
23	582	Loin	3	236.05	206.85	12.3703	87.6297	12.29	12.42	13	10.5	70
23	696	Round	Dist2	401.3	366	8.79641	91.2036	8.22	8.39	17	8	70
23	734	Round	Prox2	355.5	297.4	16.3432	83.6568	8.55	9.14	19	10.9	70
23	740	Round	Prox1	349.5	307.65	11.9742	88.0258	8.24	8.4	16	8.1	70
23	781	Loin	2	256.1	205.55	19.7384	80.2616	11.15	11.33	18	6.1	70
23	830	Round	Dist1	397.35	346.25	12.8602	87.1398	10.21	10.38	17	13.7	72.5
24	114	Round	Prox1	486.2	346.95	28.6405	71.3595	10.37	11.1	33	5.4	70
24	143	Round	Dist2	624.3	386.2	38.1387	61.8613	9.42	10.37	55	3.1	71
24	219	Round	Dart	603.65	430.65	28.659	71.341	9.5	10.31	41	3.1	70
24	285	Loin	3	319.25	251.2	21.3156	78.6844	8.44	9.04	20	0.2	70
24	290	Loin	2	360.4	313.75	12.944	87.056	11.07	11.25	18	6.9	70
24	392	Loin	1	402.85	354.85	11.9151	88.0849	12.34	12.51	17	4.1	70.1
24	499	Loin	4	237.55	191.15	19.5327	80.4673	10.46	11.58	72	5.3	70.7
24	549	Round	Dist1	636.7	479.9	24.627	75.373	10.23	10.55	32	0.3	70
24	691	Round	right	586.8	477.1	18.6946	81.3054	10.22	10.5	28	6.8	70.6
24	755	Round	Prox2	514.95	421.95	18.06	81.94	10.46	11.09	23	7	70
25	157	Round	Prox1	480.7	347.5	27.7096	72.2904	10.33	11.18	45	12.8	70
25	252	Round	Right	447.55	387.85	13.3393	86.6607	10.34	10.48	14	15.6	70.1
25	295	Loin	2	321.9	287.5	10.6865	89.3135	9.13	9.27	14	0.7	70
25	396	Loin	1	292.6	232.15	20.6596	79.3404	10.59	11.19	20	1.2	71.5
25	442	Loin	4	238.9	222.7	6.78108	93.2189	11.35	12.13	38	8.8	70
25	783	Round	Dist2	597.8	510.65	14.5785	85.4215	10.15	10.38	23	12.6	70.1
25	787	Round	Dart	502.8	389	22.6333	77.3667	9.37	10.08	31	1.1	70
25	929	Loin	3	305.05	255.35	16.2924	83.7076	12.42	12.58	16	7.3	70
25	964	Round	Prox2	388.05	335.8	13.4648	86.5352	8.38	8.57	19	9.9	72
25	999	Round	Dist1	504.4	339	32.7914	67.2086	10.33	11.17	44	2.8	71.2
26	135	Round	Dist1	426.4	335	21.4353	78.5647	11.47	12.07	20	9.3	71
26	300	Round	Prox2	314.45	277.5	11.7507	88.2493	11.2	11.33	13	12.4	71
26	425	Round	Right	456.4	358.5	21.4505	78.5495	11.58	12.24	26	6.6	70
26	445	Loin	4	291	236.3	18.7973	81.2027	12.48	13.04	16	10	70
26	559	Round	Dart	367.3	289.7	21.1271	78.8729	12.26	12.58	32	12.3	70
26	577	Round	Prox1	401.7	322.8	19.6415	80.3585	11.11	11.3	19	12.5	70
26	599	Loin	2	261.45	214.2	18.0723	81.9277	10.54	11.11	17	0.5	70.3
26	910	Loin	3	290.5	239.8	17.4527	82.5473	11.17	11.35	18	3	70
26	912	Loin	1	305	240.6	21.1148	78.8852	9.07	9.29	22	0.9	87.5
26	981	Round	Dist2	472.2	413	12.5371	87.4629	11.55	12.14	19	12.2	73.2
27	151	Round	Dist2	467.85	388	17.0674	82.9326	9.06	9.28	22	14.8	70.2
27	174	Round	Right	431.8	369.7	14.3817	85.6183	11.16	11.34	18	8.7	70
27	225	Round	Prox1	305.9	245.85	19.6306	80.3694	11.59	12.21	22	13.2	70
27	340	Loin	2	346.75	302.1	12.8767	87.1233	10.43	11	17	1.3	70.2
27	720	Round	Dart	350.3	283.5	19.0694	80.9306	9	9.23	23	15.9	70
27	760	Loin	3	258.9	228.35	11.7999	88.2001	11.29	11.38	9	12.7	70.3
27	894	Round	Dist1	353.35	298.95	15.3955	84.6045	12.28	12.42	14	12.1	72
27	907	Round	Prox2	306.4	259.2	15.4047	84.5953	11.46	12.04	18	10.9	70.1
27	925	Loin	1	401.75	323.05	19.5893	80.4107	12.24	12.52	28	0.4	70.4
27	962	Loin	4	372.75	288.15	22.6962	77.3038	8.47	9.02	15	8.9	70.2
28	159	Round	Dist1	517.95	412.15	20.4267	79.5733	11.1	11.34	24	10.8	70
28	246	Round	Dist2	479.55	364.3	24.0329	75.9671	11.1	11.4	30	12	71
28	323	Loin	4	322.8	240.95	25.3563	74.6437	10.5	11.13	23	2.4	70.4
28	380	Round	Prox2	344.85	291.45	15.485	84.515	12.37	12.59	22	13.3	70.2
28	393	Loin	1	338.75	199.4	41.1365	58.8635	11.29	11.42	13	0.8	70.1
28	441	Loin	2	336.15	290.65	13.5356	86.4644	9.16	9.31	15	6.1	70
28	457	Loin	3	349.95	302	13.702	86.298	12.5	13.07	17	11	70
28	510	Round	Prox1	349.8	277.15	20.769	79.231	11.12	11.37	25	12.8	70
28	747	Round	Right	535.9	451.4	15.7679	84.2321	12.34	12.55	21	12.4	70
28	775	Round	Dart	399	310.85	22.0927	77.9073	12.26	12.5	24	13.8	70
29	148	Loin	1	291.45	219	24.8585	75.1415	11.48	12.2	32	1.9	71.6
29	165	Round	Dart	438.2	382.1	12.8024	87.1976	11.57	12.1	13	11.3	70
29	304	Round	Prox2	382.25	324.1	15.2126	84.7874	12.01	12.25	24	11	70.3
29	342	Round	Dist1	503	401.6	20.159	79.841	11.18	11.45	27	13.2	70
29	349	Loin	4	268.3	217.1	19.0831	80.9169	11.01	11.17	16	0.1	70
29	409	Round	Prox1	407.55	357.55	12.2684	87.7316	11.41	11.58	17	9.6	70.1
29	539	Loin	2	330.75	297	10.2041	89.7959	12.55	13.08	13	11.4	74
29	754	Round	Right	493.9	405.5	17.8984	82.1016	9.07	9.29	22	15.5	70
29	944	Loin	3	335.6	290.45	13.4535	86.5465	9.24	9.37	13	3.5	73.3
29	997	Round	Dist2	473.2	400.45	15.374	84.626	11.47	12.04	17	10.7	70.1
30	155	Round	Right	521.65	449.2	13.8886	86.1114	11.11	11.31	20	10.7	70
30	270	Loin	3	283.35	236.2	16.6402	83.3598	11.19	11.35	16	1.4	70
30	298	Loin	2	307.2	256.7	16.4388	83.5612	12.48	13.05	17	13.3	70.1
30	355	Round	Prox1	422.05	340.75	19.2631	80.7369	12.03	12.27	24	9.9	70
30	493	Round	Prox2	321.85	266	17.3528	82.6472	12.26	12.42	16	10.7	70.2
30	517	Round	Dart	336.75	310.3	7.85449	92.1455	12.08	12.21	13	10.2	70.5
30	591	Round	Dist2	442.4	394.6	10.8047	89.1953	11.24	11.38	14	10.1	70.9
30	835	Round	Dist1	390.35	313.5	19.6875	80.3125	11.17	11.34	17	12.1	70
30	893	Loin	1	319.7	242.3	24.2102	75.7898	8.44	9.12	28	5.1	79
30	978	Loin	4	303.6	234.1	22.892	77.108	9.48	10.08	20	5	70
31	145	Loin	3	344.8	303.7	11.92	88.08	13.08	13.23	15	12.3	70
31	160	Loin	1	360.25	314.65	12.6579	87.3421	11.39	11.54	15	9	70
31	247	Loin	2	321.65	253.85	21.0788	78.9212	9.05	9.26	21	3	74
31	284	Round	Prox1	318.35	256.1	19.554	80.446	8.44	9.04	20	12.6	70
31	344	Round	Dart	374.2	254.15	32.0818	67.9182	12.52	13.28	36	10.5	70.5
31	538	Round	Right	439.75	393.4	10.5401	89.4599	8.5	9.02	12	9.9	71.2
31	606	Round	Dist2	458.9	380.85	17.0081	82.9919	8.54	9.16	22	12.3	70
31	682	Round	Prox2	286.5	246.5	13.9616	86.0384	8.27	8.42	15	11.1	70.2
31	756	Loin	4	294.1	252.9	14.0088	85.9912	9.47	10	13	4.9	70
31	917	Round	Dist1	385.25	297.7	22.7255	77.2745	8.25	8.52	27	9.1	70
32	271	Round	Dist2	646.85	540.8	16.3948	83.6052	9.11	9.38	27	2.5	70
32	335	Round	Prox1	464.75	399.4	14.0613	85.9387	8.5	9.06	16	11.5	70.4
32	436	Round	Dist1	492.4	366.9	25.4874	74.5126	9.08	9.42	34	1.9	70.1
32	454	Round	Prox2	400.95	325.35	18.8552	81.1448	12.43	13.03	20	10.2	70.2
32	583	Loin	1	302.5	248.4	17.8843	82.1157	9.46	10.03	17	3.5	72
32	751	Round	Right	527.1	350.2	33.561	66.439	9.36	10.32	56	8.6	70.2
32	789	Loin	4	346.5	292.4	15.6133	84.3867	11.39	11.57	18	5.3	70
32	867	Round	Dart	514.8	442.1	14.122	85.878	9.16	9.39	23	4.6	70
32	902	Loin	3	314.05	282	10.2054	89.7946	9.03	9.14	11	9	70.4
32	989	Loin	2	328.4	283.6	13.6419	86.3581	13.06	13.17	11	14.2	72
33	119	Round	Prox1	460.05	380.35	17.3242	82.6758	9.2	9.48	28	1.4	70.1
33	120	Round	Prox2	346.5	288.7	16.6811	83.3189	12.59	13.19	20	11.3	70.2
33	212	Loin	4	307.95	252.8	17.9088	82.0912	9.23	9.42	19	0.8	70.1
33	485	Loin	1	365.15	301.3	17.486	82.514	11.36	11.57	21	1.6	70.3
33	508	Round	Dist2	537.75	419.25	22.0363	77.9637	9.09	9.35	26	2.3	70
33	546	Round	Dist1	487.65	399.5	18.0765	81.9235	12.57	13.19	22	9	71
33	553	Loin	3	331.65	277.15	16.433	83.567	12.55	13.11	16	13.2	70.5
33	605	Round	Right	518.6	461.15	11.0779	88.9221	8.23	8.39	16	8.5	71
33	749	Round	Dart	373.75	328.8	12.0268	87.9732	12.52	13.05	13	11.3	72
33	801	Loin	2	356.4	279.85	21.4787	78.5213	9.31	9.52	21	0.5	70.1
34	121	Loin	4	271.55	269.25	0.84699	99.153	12.58	13.16	18	11.9	70.1
34	191	Round	Dist2	483.3	379.4	21.498	78.502	12.54	13.2	26	7.2	70
34	435	Round	Prox1	458.85	390.5	14.8959	85.1041	8.53	9.15	22	12.3	70.1
34	626	Round	Prox2	374	316.75	15.3075	84.6925	8.21	8.4	19	2	70
34	646	Round	Dart	598.35	479.49	19.8646	80.1354	9.36	10.09	33	8.6	70
34	648	Loin	1	338.3	284.25	15.9769	84.0231	9.04	9.21	17	6.6	70.8
34	679	Round	Dist1	527.25	455.65	13.5799	86.4201	8.24	8.43	19	11.2	70.4
34	729	Round	Right	616.15	441.8	28.2967	71.7033	9.25	10.09	44	3.9	70
34	826	Loin	D14	291.7	247.45	15.1697	84.8303	8.22	8.38	16	9.5	70.2
34	857	Loin	2	276.2	245.4	11.1513	88.8487	11.36	11.47	11	6.6	74.9
35	175	Round	Prox2	279.55	248.95	10.9462	89.0538	8.42	8.56	14	11.5	70
35	183	Round	Prox1	331.95	294.7	11.2216	88.7784	8.26	8.41	15	10.2	70.1
35	204	Loin	2	338.7	301.1	11.1013	88.8987	9.19	9.33	14	8.1	71.5
35	289	Loin	4	315.45	290.65	7.86178	92.1382	9.28	9.41	13	0.1	72
35	415	Loin	3	342.25	258.25	24.5435	75.4565	11.49	12.2	31	5.7	74.1
35	443	Round	Right	419.9	372.25	11.3479	88.6521	9.01	9.16	15	3	70
35	453	Round	Dist1	499.75	422.7	15.4177	84.5823	8.25	8.47	22	10.3	70
35	472	Round	Dart	394.5	343.9	12.8264	87.1736	12.5	13.12	22	10.2	70.2
35	805	Round	Dist1	376.05	338.05	10.105	89.895	12.57	13.11	14	11.5	70.2
35	990	Loin	1	327.35	263.9	19.3829	80.6171	12.34	12.52	18	4.6	70
36	144	Round	Prox2	371.9	310.1	16.6174	83.3826	8.41	9.05	24	13.2	72
36	176	Round	Dist1	521.75	431.3	17.3359	82.6641	8.21	8.48	27	7.9	70
36	310	Round	Right	555.95	451.6	18.7697	81.2303	9.09	9.34	25	10.5	70
36	394	Round	Dart	406.45	328.45	19.1906	80.8094	8.3	8.55	25	10.7	72
36	424	Loin	2	225.9	200.55	11.2218	88.7782	9.07	9.17	10	8.3	70.2
36	501	Loin	4	244.55	208.5	14.7414	85.2586	12.55	13.11	16	14	70.2
36	568	Round	Prox1	394.1	343.5	12.8394	87.1606	8.22	8.4	18	12.9	40
36	637	Round	Dist2	461.85	405.4	12.2226	87.7774	8.23	8.39	16	10.4	70.2
36	771	Loin	3	229.85	201.15	12.4864	87.5136	9.47	10.02	15	2.9	70.2
36	806	Loin	1	256.25	226.05	11.7854	88.2146	11.48	12	12	11.8	72.3
37	136	Loin	3	268.55	229.75	14.448	85.552	9.14	9.27	13	9.1	76
37	236	Loin	4	225.35	205.55	8.78633	91.2137	9.42	9.51	9	9.6	70.2
37	362	Round	Dist1	587.7	417.15	29.0199	70.9801	9.16	9.55	39	7.7	70.1
37	483	Loin	2	225	193.1	14.1778	85.8222	11.38	11.5	12	5.5	70.1
37	589	Round	Right	568.3	397.6	30.037	69.963	12.52	13.28	36	9	70
37	597	Round	Prox2	548.75	428.75	21.8679	78.1321	9.18	9.46	28	8.8	70
37	613	Loin	1	319.55	282.6	11.5631	88.4369	12.34	12.49	15	11	70
37	796	Round	Prox1	566.6	488.15	13.8457	86.1543	8.25	8.49	24	9.3	70
37	890	Round	Dist2	519.45	417.9	19.5495	80.4505	9.03	9.24	21	9.6	70
37	914	Round	Dart	498.25	387.4	22.2479	77.7521	9.31	9.51	20	10.6	70.1
38	182	Loin	2	274.6	249.7	9.06773	90.9323	9.25	9.35	10	8.6	70.2
38	199	Loin	3	294.8	221.1	25	75	13.07	13.18	11	12.5	70.9
38	427	Loin	1	278.95	245.95	11.8301	88.1699	11.49	12.01	12	8.9	75
38	463	Round	Dist2	564.2	449.9	20.2588	79.7412	12.5	13.14	24	8.8	70
38	509	Round	Dart	651.75	525	19.4476	80.5524	8.22	8.53	31	9.8	70
38	532	Loin	4	310.45	239.15	22.9667	77.0333	8.45	9.11	26	0.3	74
38	545	Round	Dist1	594.7	488.85	17.7989	82.2011	8.41	9.02	21	15	70.1
38	560	Round	Prox1	406.25	338	16.8	83.2	9.02	9.23	21	15.1	71.2
38	780	Round	Right	437.75	316.5	27.6985	72.3015	9	9.29	29	10.2	70
38	878	Round	Prox2	479.05	392.45	18.0774	81.9226	8.22	8.47	25	7.8	70.6

## Sheet: WarnerBratzler Data
Tag	Code	Cut	Position	Shear1	Shear2	Shear3	Shear4	Shear5	Shear6	Shear7	Shear
1	629	Loin	1	2.8648	3.5896	3.3119	2.1946	4.538	3.2442	.	3.29052
1	469	Loin	2	6.7448	5.277	6.4226	6.0815	2.7757	4.1558	.	5.2429
1	918	Loin	3	2.1927	3.8702	2.0232	1.1882	2.7129	2.5129	.	2.41668
1	455	Loin	4	1.0963	1.9573	1.8297	1.4232	1.5721	0.9558	.	1.4724
1	309	Round	Dart	3.0785	7.4687	4.5647	4.0212	1.4402	4.1281	.	4.1169
1	450	Round	Dist1	3.2676	3.4053	3.5547	2.721	2.1541	3.0002	2.7162	2.97416
1	397	Round	Dist2	4.3208	3.0596	2.5459	3.1986	3.5284	2.2407	.	3.149
1	562	Round	Prox1	2.2579	1.807	3.528	.	3.0432	5.1325	.	3.15372
1	361	Round	Prox2	3.4211	4.4716	4.6167	4.2064	4.79	4.2505	.	4.29272
1	186	Round	Right	2.7532	2.7092	2.9026	1.8052	3.2809	6.8022	2.5552	3.25836
2	449	Loin	1	2.5962	1.452	1.7261	4.3921	5.0721	2.0622	.	2.88345
2	627	Loin	2	3.5925	2.9021	3.146	2.9368	3.3067	4.1436	.	3.33795
2	921	Loin	3	3.3927	3.2879	1.6603	2.2932	4.1779	2.8082	.	2.9367
2	103	Loin	4	3.7796	2.1918	1.3811	2.5113	2.6949	1.7189	.	2.3796
2	908	Round	Dart	4.8038	3.7285	3.4846	3.1639	2.9251	2.0017	.	3.35127
2	924	Round	Dist1	4.7495	2.2492	2.1085	2.3079	1.3092	1.2132	2.8832	2.40296
2	555	Round	Dist2	3.2481	2.557	2.8437	3.7646	3.9189	2.297	.	3.10488
2	161	Round	Prox1	3.1533	2.2595	2.4926	2.9462	3.0925	2.2339	1.5354	2.53049
2	853	Round	Prox2	2.3167	3.2061	3.2349	2.569	2.5186	2.6448	2.0162	2.64376
2	596	Round	Right	3.7251	3.3434	1.362	1.9451	2.077	2.2936	.	2.4577
3	794	Loin	1	2.5013	2.6027	2.5551	2.2631	1.9685	2.1306	.	2.33688
3	491	Loin	2	7.0424	8.0016	6.9418	9.2533	8.2033	7.8257	.	7.87802
3	869	Loin	3	4.8806	3.5308	4.1989	2.7885	3.409	2.8853	.	3.61552
3	848	Loin	4	2.1132	1.7228	2.1814	1.8848	2.5428	3.1513	.	2.26605
3	623	Round	Dart	3.6229	3.7886	3.5436	3.335	3.039	3.2674	.	3.43275
3	273	Round	Dist1	4.3513	2.5098	3.3528	3.209	4.656	4.3687	3.4071	3.69353
3	528	Round	Dist2	3.7921	2.2234	3.3664	3.6478	3.9462	3.2331	.	3.36817
3	321	Round	Prox1	3.0548	4.6156	5.5006	4.5515	4.3216	3.8131	2.5674	4.06066
3	389	Round	Prox2	2.6312	2.7921	2.4622	6.035	1.5241	2.7627	.	3.03455
3	666	Round	Right	5.1381	5.5127	4.0352	2.1938	2.7898	2.7082	.	3.72963
4	998	Loin	1	2.2433	1.5532	2.6595	2.0638	2.4304	2.328	.	2.21303
4	324	Loin	2	1.3849	3.2169	0.9686	1.9857	2.5822	1.3823	.	1.9201
4	374	Loin	3	2.5963	2.6846	2.8972	2.2815	2.576	2.1521	.	2.53128
4	364	Loin	4	2.3457	1.9395	2.1198	1.2934	1.7432	2.4671	.	1.98478
4	695	Round	Dart	2.1561	2.5601	3.34	3.3493	3.212	4.1639	2.844	3.08934
4	544	Round	Dist1	4.4971	7.2878	2.6683	3.1444	1.8416	1.7598	2.9771	3.45373
4	685	Round	Dist2	2.2924	3.0122	2.9082	2.1933	2.652	1.9038	.	2.49365
4	798	Round	Prox1	1.4666	2.1673	1.942	2.2789	2.7886	1.6477	2.7459	2.14814
4	883	Round	Prox2	5.3463	1.8286	3.2874	3.4577	1.4704	1.8063	1.969	2.73796
4	768	Round	Right	3.3067	2.7119	5.0535	3.1986	3.7113	3.3574	.	3.55657
5	841	Loin	1	1.9158	3.9213	1.8916	3.3397	0.9273	1.9392	.	2.32248
5	370	Loin	2	5.2678	5.0822	2.8023	2.2552	4.8671	3.148	.	3.90377
5	811	Loin	3	3.9269	6.533	6.9465	5.7514	5.2089	4.1612	.	5.42132
5	975	Loin	4	4.4075	4.0185	3.3792	4.5302	3.4004	4.1018	.	3.97293
5	315	Round	Dart	4.0803	3.1731	4.0556	5.1448	4.3469	4.0052	.	4.13432
5	166	Round	Dist1	5.0856	3.9369	4.0704	2.589	2.8555	2.3906	.	3.488
5	113	Round	Dist2	2.2555	3.1657	4.0493	5.3395	5.432	3.7371	5.0154	4.14207
5	945	Round	Prox1	4.6646	3.4475	2.8665	2.2655	3.9945	4.0471	2.5485	3.40489
5	901	Round	Prox2	4.8549	6.4871	2.0104	3.5998	2.3868	1.6067	.	3.49095
5	651	Round	Right	3.1637	1.7772	2.0996	1.9725	3.4959	2.9218	.	2.57178
6	772	Loin	1	2.848	2.5581	2.8658	2.1974	2.1591	2.1896	.	2.46967
6	663	Loin	2	2.4004	3.1493	2.5102	1.9828	3.4554	3.5117	.	2.83497
6	319	Loin	3	2.8157	4.3235	3.4825	2.6032	3.32	4.3395	.	3.48073
6	190	Loin	4	7.0613	3.949	5.0853	5.6564	5.2746	3.6124	.	5.1065
6	230	Round	Dart	5.1676	3.7343	1.9024	3.686	4.0464	2.6476	1.8548	3.2913
6	525	Round	Dist1	4.3066	3.8482	3.2143	3.2575	4.9228	2.1743	1.7972	3.36013
6	218	Round	Dist2	4.5097	2.6512	3.1429	2.3913	3.3257	3.6366	.	3.27623
6	926	Round	Prox1	2.3982	2.6988	2.7509	.	2.0565	3.8957	.	2.76002
6	357	Round	Prox2	4.3383	3.3124	3.4329	.	3.3586	2.1982	.	3.32808
6	838	Round	Right	2.0825	3.9683	2.2605	2.2346	4.0425	3.3265	.	2.98582
7	286	Loin	1	2.497	2.6257	3.9875	3.3136	3.1412	2.8225	.	3.06458
7	506	Loin	2	2.8282	2.4714	2.8417	2.745	2.236	3.4539	.	2.7627
7	773	Loin	3	5.6828	3.1414	4.7696	2.1332	3.8278	5.2345	.	4.13155
7	169	Loin	4	3.3131	2.9041	3.4488	4.128	2.0817	3.2071	.	3.18047
7	312	Round	Dart	4.2495	2.3528	2.7889	2.3049	2.7544	3.0594	1.997	2.7867
7	960	Round	Dist1	4.8043	4.3491	2.7448	2.6416	2.3621	2.2362	1.4282	2.93804
7	382	Round	Dist2	6.365	2.955	2.9102	2.7781	3.1266	3.0681	.	3.53383
7	895	Round	Prox1	2.6447	1.7628	2.1448	.	2.4947	3.9831	.	2.60602
7	318	Round	Prox2	4.8972	3.389	1.4607	1.7485	1.9731	1.9575	.	2.571
7	850	Round	Right	2.8914	1.5862	2.4786	4.0271	3.2456	2.6245	.	2.8089
8	576	Loin	1	2.7192	4.7461	3.0958	2.1737	2.9093	3.4491	.	3.1822
8	746	Loin	2	3.2769	3.1752	4.7207	4.2806	2.9031	4.123	.	3.74658
8	550	Loin	3	4.5474	4.7897	5.3631	5.6799	5.2172	3.6206	.	4.86965
8	459	Loin	4	2.7452	2.8616	2.5344	2.363	2.9048	2.9984	.	2.73457
8	420	Round	Dart	6.86	6.1753	3.8457	4.5964	2.672	3.8803	2.7832	4.40184
8	767	Round	Dist1	3.73	3.0081	2.0209	2.968	4.0393	3.8808	.	3.27452
8	360	Round	Dist2	5.4179	4.039	3.4986	2.98	5.2112	5.3504	6.2913	4.68406
8	969	Round	Prox1	4.287	4.9051	4.9355	3.9984	2.8778	3.2148	.	4.03643
8	765	Round	Prox2	3.745	4.2383	4.9679	2.3304	4.9473	4.2331	.	4.077
8	105	Round	Right	5.2254	5.2011	5.1811	4.3822	5.1707	4.4303	4.7971	4.91256
9	381	Loin	1	4.7572	3.4913	5.9846	5.1371	4.6728	4.8864	.	4.82157
9	122	Loin	2	2.7526	2.1637	2.2725	4.1609	4.0695	5.7928	.	3.53533
9	208	Loin	3	3.7712	3.7595	3.5834	3.5153	3.3017	4.8433	.	3.79573
9	840	Loin	4	1.7848	2.1559	2.914	3.3659	4.9216	3.9313	.	3.17892
9	940	Round	Dart	2.2848	3.4531	2.4628	2.1899	2.2377	2.1262	3.0828	2.54819
9	297	Round	Dist1	2.3725	2.2589	2.7117	2.0661	1.4871	2.1728	.	2.17818
9	833	Round	Dist2	3.3485	2.4331	1.6024	2.5757	2.0894	1.2202	.	2.21155
9	303	Round	Prox1	1.8974	3.3041	6.0485	1.6495	2.3323	1.9482	1.8606	2.72009
9	530	Round	Prox2	3.0457	1.4898	2.8573	2.002	2.5622	1.88	.	2.30617
9	185	Round	Right	2.2425	2.5094	2.3436	2.735	1.3252	3.1831	5.0381	2.76813
10	588	Loin	1	4.0578	3.4794	1.8764	2.3122	4.0402	1.9073	.	2.94555
10	650	Loin	2	1.9047	2.4863	2.7052	2.2818	2.492	2.1641	.	2.33902
10	870	Loin	3	3.0983	3.1836	2.8413	4.6477	3.5695	8.0237	.	4.22735
10	134	Loin	4	0.9753	1.2795	0.8565	0.8577	1.4042	1.3396	.	1.1188
10	371	Round	Dart	8.1726	4.1879	3.207	2.7999	2.7627	.	.	4.22602
10	158	Round	Dist1	3.7032	5.1462	3.9058	3.5833	3.9812	3.1676	3.1036	3.7987
10	761	Round	Dist2	4.0451	3.8038	4.7777	4.1004	2.5972	4.3507	.	3.94582
10	672	Round	Prox1	5.6964	3.5665	2.4592	2.4237	5.9985	3.8668	.	4.00185
10	368	Round	Prox2	2.8393	3.7337	3.8715	2.9359	3.21	3.5865	.	3.36282
10	859	Round	Right	3.7629	5.2621	3.2031	1.7888	.	2.5107	.	3.30552
11	558	Loin	1	4.374	4.5162	3.3818	4.4302	4.4552	3.7259	.	4.14722
11	864	Loin	2	4.728	3.1779	5.2827	5.1383	4.3636	4.1074	.	4.46632
11	986	Loin	3	2.4027	2.9734	3.5701	3.0809	3.5925	3.0879	.	3.11792
11	540	Loin	4	3.6422	2.9849	3.5588	2.436	2.6773	2.9557	.	3.04248
11	858	Round	Dart	5.6962	5.1125	2.3555	2.6158	3.1269	2.2925	.	3.53323
11	753	Round	Dist1	3.9107	4.0468	4.015	4.1129	3.8176	4.0967	.	3.99995
11	578	Round	Dist2	4.5403	3.842	2.9	3.4532	4.2603	4.0332	.	3.83817
11	876	Round	Prox1	3.1885	2.1975	1.9655	2.9929	2.4097	3.5132	3.0774	2.76353
11	823	Round	Prox2	5.0241	4.9173	3.9428	3.663	2.6519	3.0833	.	3.8804
11	930	Round	Right	2.6621	4.0289	1.6104	2.5873	3.7904	3.6451	3.1227	3.06384
12	196	Loin	1	3.7895	4.5349	4.9558	2.699	3.618	3.5764	.	3.86227
12	511	Loin	2	5.1434	5.0304	4.033	4.9664	3.2021	4.4784	.	4.47562
12	500	Loin	3	7.3906	4.946	4.7424	3.6092	6.1123	3.769	.	5.09492
12	575	Loin	4	2.9421	2.609	2.6467	4.3001	1.7324	2.1136	.	2.72398
12	654	Round	Dart	2.3923	4.6342	2.3482	2.1362	2.1743	2.5803	.	2.71092
12	683	Round	Dist1	3.0268	3.0417	2.0323	1.8901	3.2476	2.1004	2.1161	2.49357
12	206	Round	Dist2	2.7734	3.952	2.1345	2.508	2.6678	2.6655	.	2.78353
12	813	Round	Prox1	2.9096	2.4244	2.4889	1.7413	2.0223	1.8278	1.3858	2.1143
12	330	Round	Prox2	3.2511	4.1304	2.2102	2.1435	2.6551	2.7928	.	2.86385
12	636	Round	Right	3.3853	2.2707	1.2981	2.5519	3.9857	3.9382	.	2.90498
13	723	Loin	1	3.1145	1.6569	2.0895	2.3775	2.7228	1.8661	.	2.30455
13	226	Loin	2	3.523	3.9058	3.3438	2.5819	3.8109	2.7455	.	3.31848
13	703	Loin	3	1.5277	2.3222	3.105	2.2436	1.5187	2.5669	.	2.21402
13	988	Loin	4	2.9233	2.712	4.0632	2.8459	3.4476	1.6763	.	2.94472
13	207	Round	Dart	3.8971	1.993	4.0104	2.0985	4.7455	4.1281	.	3.47877
13	728	Round	Dist1	3.8423	7.1763	4.6329	2.8818	5.16	4.4058	.	4.68318
13	725	Round	Dist2	2.7229	2.6083	3.1169	2.8251	4.2886	5.2281	.	3.46498
13	860	Round	Prox1	2.1219	4.3562	2.4405	4.1289	3.2299	2.9926	.	3.21167
13	229	Round	Prox2	2.8489	1.7563	4.0777	2.9511	3.2599	2.5536	.	2.90792
13	498	Round	Right	3.7066	2.994	2.1339	2.094	1.2178	2.6077	.	2.459
14	669	Loin	1	2.8464	3.1234	2.99	2.8315	2.4444	2.8745	.	2.8517
14	249	Loin	2	3.0501	5.9389	3.0716	3.4744	3.0656	2.9557	.	3.59272
14	633	Loin	3	2.2121	2.6469	3.4056	1.8841	1.974	1.8125	.	2.32253
14	439	Loin	4	2.2586	5.0928	4.3859	5.1081	2.5459	6.6216	.	4.33548
14	593	Round	Dart	5.4169	4.9008	3.3606	2.5914	8.5389	2.7033	3.0008	4.35896
14	622	Round	Dist1	4.9609	3.7542	5.0172	3.5823	2.8119	3.7924	.	3.98648
14	262	Round	Dist2	2.7904	3.351	1.5841	4.4007	3.3727	2.8505	.	3.05823
14	379	Round	Prox1	3.9536	9.1929	6.91	4.733	4.6646	3.0599	.	5.419
14	743	Round	Prox2	4.8087	5.4914	4.8879	4.2958	4.9536	3.3323	.	4.62828
14	898	Round	Right	4.6658	4.7929	3.0924	4.5105	1.74	2.8392	.	3.6068
15	656	Loin	1	1.2869	0.9283	1.8916	1.0933	1.4736	1.9143	.	1.43133
15	534	Loin	2	2.5389	1.9195	2.1843	1.9643	2.9432	2.3211	.	2.31188
15	791	Loin	3	4.0556	5.4069	5.0552	4.4786	5.4848	4.8624	.	4.89058
15	710	Loin	4	3.4844	2.9888	3.8527	3.3531	2.8778	3.1999	.	3.29278
15	283	Round	Dart	4.0338	5.3504	4.1519	2.2075	2.8807	2.9562	.	3.59675
15	385	Round	Dist1	5.1885	3.9333	3.9113	2.6286	4.0301	1.8412	2.3794	3.41606
15	822	Round	Dist2	3.2456	4.2657	3.8887	3.0124	4.1806	2.5976	.	3.53177
15	639	Round	Prox1	1.1851	1.15606	2.6436	3.9391	2.8927	3.447	2.4114	2.52499
15	750	Round	Prox2	2.4745	3.1655	2.2975	4.624	1.7021	2.8575	.	2.85352
15	515	Round	Right	4.1669	3.3347	4.0387	1.8756	5.6182	2.4563	.	3.58173
16	106	Loin	1	2.4764	3.2174	2.47	2.7959	3.0149	4.036	.	3.00177
16	671	Loin	2	2.358	4.0771	1.9473	3.3673	2.1865	2.5143	.	2.74175
16	139	Loin	3	2.3646	3.4659	3.471	2.4684	2.9075	3.6383	.	3.05262
16	358	Loin	4	2.8534	2.1482	2.9304	2.5138	2.1296	2.1001	.	2.44592
16	444	Round	Dart	2.59	2.8249	3.4004	3.2796	2.392	1.8029	.	2.71497
16	968	Round	Dist1	3.9052	3.7856	2.7375	.	2.2775	1.6705	.	2.87526
16	516	Round	Dist2	4.6266	3.6333	3.3441	3.6628	3.5396	3.9222	6.6407	4.19561
16	598	Round	Prox1	8.2866	3.2743	2.7103	2.9505	3.7271	3.5555	.	4.08405
16	655	Round	Prox2	6.0928	8.0682	4.9615	4.1572	4.0048	4.8357	.	5.35337
16	353	Round	Right	2.9879	2.6581	2.0694	3.2724	3.508	2.6848	1.9149	2.72793
17	356	Loin	1	2.9664	5.1985	3.7395	2.9048	2.4089	3.5053	.	3.4539
17	547	Loin	2	4.3454	4.2186	3.5643	2.6799	4.3404	8.0722	.	4.5368
17	638	Loin	3	2.1835	2.9499	4.5087	3.5805	4.5603	2.6269	.	3.40163
17	129	Loin	4	4.5684	3.8963	3.6933	2.98	3.5904	2.8125	.	3.59015
17	403	Round	Dart	6.5218	5.2905	3.8828	3.6703	4.0081	4.7469	4.4049	4.64647
17	101	Round	Dist1	6.381	3.5955	3.513	2.5818	3.4649	4.4932	3.5465	3.93941
17	437	Round	Dist2	4.2021	2.6035	2.0099	3.7947	4.1736	3.6337	4.1969	3.51634
17	795	Round	Prox1	5.1302	4.0244	3.98	2.5657	3.8487	4.4285	3.46	3.91964
17	875	Round	Prox2	6.5469	4.8274	5.134	4.0638	7.1213	4.9703	.	5.44395
17	495	Round	Right	3.1925	1.8959	2.0055	2.0668	3.4254	2.9974	3.1734	2.67956
18	142	Loin	1	1.8264	1.5705	1.9154	2.1827	0.7919	2.1537	.	1.7401
18	732	Loin	2	1.9215	2.6619	1.6043	1.4627	1.8924	1.5494	.	1.8487
18	317	Loin	3	2.5619	2.488	2.3983	2.3887	2.3225	3.2271	.	2.56442
18	809	Loin	4	2.9106	1.8515	4.0134	2.5498	1.7844	2.5088	.	2.60308
18	674	Round	Dart	6.9132	3.5285	2.4266	3.2059	4.2303	7.6034	4.2275	4.59077
18	942	Round	Dist1	6.7442	3.9647	3.4776	2.7888	2.7583	2.4587	2.7773	3.56709
18	993	Round	Dist2	2.9477	3.19	3.6502	2.9945	4.0202	3.7318	.	3.4224
18	958	Round	Prox1	4.2754	3.2907	2.3398	3.6769	3.5212	2.862	.	3.32767
18	256	Round	Prox2	4.3002	4.6048	3.6974	4.0697	4.8237	5.527	.	4.5038
18	792	Round	Right	8.4061	7.3902	3.7135	2.4141	4.1228	4.4534	4.7128	5.03041
19	688	Loin	1	2.4325	1.5481	1.4662	2.007	1.2843	1.4322	.	1.69505
19	401	Loin	2	2.2295	1.5637	1.5741	1.6512	1.4426	1.6649	.	1.68767
19	590	Loin	3	2.7777	1.9794	2.2893	1.6246	2.5523	2.1975	.	2.2368
19	987	Loin	4	3.111	4.9053	3.0008	2.2244	3.5225	2.8755	.	3.27325
19	147	Round	Dart	2.0414	2.4168	1.9821	4.3329	3.0653	3.2091	.	2.84127
19	261	Round	Dist1	3.6205	4.7089	3.1397	1.6881	2.0959	3.4035	1.6723	2.90413
19	152	Round	Dist2	3.0925	2.7455	2.0203	2.1059	2.0948	2.1853	.	2.37405
19	535	Round	Prox1	4.431	2.5834	2.8162	2.4783	2.4186	2.7609	1.8917	2.76859
19	351	Round	Prox2	4.2666	3.3642	2.4676	2.3966	2.8929	2.5616	.	2.99158
19	548	Round	Right	4.1995	2.5808	1.583	2.6695	1.7076	2.8871	.	2.60458
20	949	Loin	1	4.0729	3.5668	3.9815	2.1272	2.9683	2.1632	.	3.14665
20	866	Loin	2	1.578	1.828	1.6224	0.8756	2.2541	1.693	.	1.64185
20	906	Loin	3	3.038	3.7818	4.1547	3.278	3.8251	3.2746	.	3.5587
20	228	Loin	4	2.5198	3.2963	2.4515	2.7995	2.7676	1.3325	.	2.52787
20	769	Round	Dart	3.5359	4.569	1.9194	2.5651	2.0665	3.3023	.	2.99303
20	832	Round	Dist1	3.6716	1.9549	2.0396	1.8462	1.6061	1.963	.	2.18023
20	325	Round	Dist2	3.3747	2.0076	3.6202	2.9194	1.9453	2.1337	.	2.66682
20	477	Round	Prox1	3.8572	2.5805	3.8205	2.4912	4.0511	3.3529	2.82	3.28191
20	111	Round	Prox2	3.6427	1.484	3.107	2.6449	2.6768	2.8827	1.2477	2.52654
20	686	Round	Right	4.2615	3.1276	2.7703	1.983	2.6545	2.1478	.	2.82412
21	701	Loin	1	1.701	2.284	1.7216	2.0703	1.6604	2.2787	.	1.95267
21	250	Loin	2	1.3681	1.1955	0.9138	1.5238	1.3096	2.0199	.	1.38845
21	922	Loin	3	3.7184	3.1888	3.554	3.7441	2.7001	3.2895	.	3.36582
21	953	Loin	4	1.2781	1.7514	1.6981	2.073	1.7981	1.4655	.	1.67737
21	417	Round	Dart	3.9383	4.7508	1.5684	1.9573	2.2848	3.9496	2.7381	3.02676
21	973	Round	Dist1	5.2	4.0958	2.8851	2.1694	1.6506	3.889	1.6209	3.07297
21	855	Round	Dist2	3.3947	2.8389	2.9369	2.8836	2.974	3.0468	2.8705	2.9922
21	408	Round	Prox1	3.955	4.377	3.0152	2.9119	3.7514	5.1281	4.6506	3.96989
21	923	Round	Prox2	3.3567	3.4744	2.784	2.8516	2.9779	2.7971	1.2749	2.78809
21	458	Round	Right	3.6583	4.3184	4.5916	2.131	2.2769	3.4191	2.3966	3.25599
22	779	Loin	1	2.034	2.1782	1.6959	2.2768	1.918	1.3604	.	1.91055
22	882	Loin	2	1.6865	2.1796	1.6007	1.9367	1.3519	1.9243	.	1.77995
22	877	Loin	3	1.1005	1.1275	0.9757	0.9693	2.5119	0.5671	.	1.20867
22	711	Loin	4	2.5517	1.4729	2.951	2.4535	1.9325	2.6634	.	2.3375
22	955	Round	Dart	3.6402	1.9255	2.2764	2.2485	2.5518	3.0228	3.823	2.78403
22	764	Round	Dist1	3.1876	1.9784	1.9458	2.743	2.4754	3.0693	.	2.56658
22	518	Round	Dist2	2.1341	1.7864	1.1758	1.6412	1.4416	1.5748	.	1.62565
22	233	Round	Prox1	4.025	3.7342	2.9531	2.186	3.4527	2.6426	.	3.1656
22	974	Round	Prox2	3.7354	3.8225	2.2437	1.9673	2.7427	2.8929	.	2.90075
22	932	Round	Right	2.462	2.6447	1.6753	1.9073	1.727	2.0344	2.3033	2.10771
23	543	Loin	1	2.1222	1.7548	3.7099	3.0029	2.0257	2.0743	.	2.4483
23	781	Loin	2	3.6679	3.0778	4.8303	4.221	2.3063	3.3567	.	3.57667
23	582	Loin	3	3.1855	1.9106	1.8372	1.9948	2.7362	1.9798	.	2.27402
23	480	Loin	4	3.7134	4.0693	2.745	2.7881	2.9513	3.0554	.	3.22042
23	490	Round	Dart	4.704	3.8672	3.3342	3.3312	2.9361	3.1471	.	3.5533
23	830	Round	Dist1	4.2089	3.4229	3.8499	2.3921	2.4778	2.6951	3.1151	3.16597
23	696	Round	Dist2	3.9854	3.2757	2.1583	2.008	2.9811	2.3215	.	2.78833
23	740	Round	Prox1	6.4995	3.6686	3.2121	2.867	3.2035	2.8033	.	3.709
23	734	Round	Prox2	2.5492	7.2541	2.7833	2.126	4.0154	4.6075	.	3.88925
23	234	Round	Right	4.7983	4.8172	4.2441	2.2204	2.2842	2.6782	1.9374	3.28283
24	392	Loin	1	1.7104	2.5876	2.4606	1.8977	1.8313	4.5211	.	2.50145
24	290	Loin	2	2.6327	1.8631	1.8737	1.539	3.2798	1.5986	.	2.13115
24	285	Loin	3	8.5261	5.7355	6.7309	6.9997	3.7845	5.6018	.	6.22975
24	499	Loin	4	3.4726	2.7309	3.4771	3.775	2.8471	3.8226	.	3.35422
24	219	Round	Dart	4.1301	3.2623	4.9853	5.3659	3.6959	3.4976	3.9014	4.11979
24	549	Round	Dist1	4.3044	3.0137	3.1901	4.4896	4.1747	4.8365	4.7615	4.11007
24	143	Round	Dist2	5.3976	6.0098	5.3349	4.6502	3.6623	4.0894	.	4.85737
24	114	Round	Prox1	6.6541	5.3324	3.8839	3.9736	5.6757	5.5623	5.2726	5.19351
24	755	Round	Prox2	6.6043	5.1161	4.6637	3.9777	2.3009	2.7441	.	4.23447
24	691	Round	right	3.7979	2.9753	2.9909	2.312	2.0374	2.6951	2.6307	2.77704
25	396	Loin	1	2.9816	3.629	2.7555	3.8328	3.6757	3.5323	.	3.40115
25	295	Loin	2	2.1169	1.4959	1.8935	4.6562	2.654	2.248	.	2.51075
25	929	Loin	3	2.3353	2.1335	1.8254	3.1794	2.0598	1.6005	.	2.18898
25	442	Loin	4	5.0679	4.8118	3.3023	2.1298	5.6553	4.3649	.	4.222
25	787	Round	Dart	3.4816	4.66	2.8814	2.9912	3.7565	2.9628	.	3.45558
25	999	Round	Dist1	3.99	3.1807	3.6777	3.2931	4.2155	4.1993	4.2605	3.83097
25	783	Round	Dist2	3.1877	2.2848	3.6796	2.018	2.387	3.5822	.	2.85655
25	157	Round	Prox1	4.8991	5.2606	6.4813	3.1809	4.4912	3.2144	4.9334	4.63727
25	964	Round	Prox2	3.7883	3.0639	3.5541	2.0707	3.1023	2.0253	.	2.9341
25	252	Round	Right	5.6757	5.2345	2.3814	1.8633	4.6866	2.2784	.	3.68665
26	912	Loin	1	6.7943	3.3894	4.6894	5.8005	2.9694	7.8865	.	5.25492
26	599	Loin	2	2.9371	2.315	3.3216	2.6243	3.9987	2.1568	.	2.89225
26	910	Loin	3	2.2042	1.8693	2.0922	2.3247	2.4729	1.5973	.	2.09343
26	445	Loin	4	2.167	3.1288	4.201	3.2037	3.6513	2.3381	.	3.11498
26	559	Round	Dart	3.7807	2.5053	3.2536	2.7536	2.9457	3.9814	2.969	3.1699
26	135	Round	Dist1	3.1	3.6362	3.4623	2.8503	3.2932	3.0387	6.7186	3.72847
26	981	Round	Dist2	2.392	2.8965	2.6748	1.8916	2.6782	2.3254	.	2.47642
26	577	Round	Prox1	3.285	1.7839	2.1531	1.9279	3.1534	1.9008	.	2.36735
26	300	Round	Prox2	5.1272	2.3957	2.8039	2.7971	3.2311	1.8994	.	3.0424
26	425	Round	Right	3.6062	2.5232	2.443	3.1001	4.3421	3.5667	.	3.26355
27	925	Loin	1	2.6855	3.0386	3.2539	3.827	2.8834	2.9473	.	3.10595
27	340	Loin	2	3.9215	2.4134	3.8513	1.9814	2.1862	2.4229	.	2.79612
27	760	Loin	3	2.9918	2.0526	2.0167	2.4495	2.5005	1.9533	.	2.3274
27	962	Loin	4	2.5517	4.1443	3.1904	2.6437	2.5758	2.9767	.	3.01377
27	720	Round	Dart	8.353	3.1213	3.3973	3.9027	3.3669	3.5068	.	4.27467
27	894	Round	Dist1	5.1707	4.2318	2.9595	3.301	3.0087	3.0377	3.005	3.53063
27	151	Round	Dist2	5.035	3.8437	3.8923	3.2467	2.5415	4.1565	.	3.78595
27	225	Round	Prox1	3.8956	4.5586	3.837	3.2899	3.9861	3.4409	.	3.83468
27	907	Round	Prox2	2.6555	3.559	2.2882	.	3.8229	1.8529	.	2.8357
27	174	Round	Right	4.5517	3.734	3.0386	2.7406	3.003	2.2564	2.0432	3.0525
28	393	Loin	1	4.0402	2.2922	3.5889	3.4137	3.9136	2.3359	.	3.26408
28	441	Loin	2	3.1399	3.978	3.1394	3.2897	2.9528	4.5431	.	3.50715
28	457	Loin	3	2.3744	2.1003	2.0157	4.3632	2.0793	2.8405	.	2.6289
28	323	Loin	4	2.5916	2.9148	4.238	4.2022	2.8166	4.4414	.	3.5341
28	775	Round	Dart	5.2649	3.232	2.2059	3.4362	2.5532	5.9532	6.044	4.09849
28	159	Round	Dist1	2.9231	4.0623	2.9598	3.321	6.3397	4.5594	.	4.02755
28	246	Round	Dist2	3.1816	2.8152	2.1939	2.6725	7.1174	7.822	4.7093	4.35884
28	510	Round	Prox1	4.5944	3.6179	5.7237	2.695	2.6597	4.3628	.	3.94225
28	380	Round	Prox2	2.7709	3.3572	2.7553	2.3642	4.3658	4.3084	.	3.3203
28	747	Round	Right	4.2873	3.1832	3.4951	2.3854	2.5993	3.3554	.	3.21762
29	148	Loin	1	2.4128	2.3945	1.6236	3.9478	3.3836	6.4313	.	3.3656
29	539	Loin	2	2.0308	1.8334	3.3084	2.2808	4.7987	1.5459	.	2.633
29	944	Loin	3	2.0863	2.9286	2.4702	4.601	4.1092	2.1542	.	3.05825
29	349	Loin	4	3.1748	2.633	3.0128	2.0282	2.6427	2.2445	.	2.62267
29	165	Round	Dart	3.0949	3.5041	1.903	2.2585	1.7013	2.1911	.	2.44215
29	342	Round	Dist1	3.7311	3.5859	2.8513	3.3786	3.0229	3.2177	3.3341	3.30309
29	997	Round	Dist2	3.5031	2.8313	2.7793	1.7997	2.8003	2.5766	2.7722	2.72321
29	409	Round	Prox1	3.5768	3.8307	2.1545	2.3666	2.5794	2.4474	.	2.8259
29	304	Round	Prox2	2.3785	1.961	2.667	2.2925	2.4435	3.6502	.	2.56545
29	745	Round	Right	5.4618	5.1532	3.0435	2.9429	2.8368	2.7775	.	3.70262
30	893	Loin	1	5.5172	4.0678	3.6008	3.0304	4.0727	5.4337	.	4.2871
30	298	Loin	2	1.9888	3.0011	3.5883	2.6082	1.6765	2.3329	.	2.53263
30	270	Loin	3	2.1483	2.9854	2.5483	2.3742	2.4021	2.4661	.	2.4874
30	978	Loin	4	5.1315	2.2365	3.3277	2.6694	2.6754	3.6379	.	3.27973
30	517	Round	Dart	2.7363	1.6793	3.7363	2.3436	1.8092	3.337	.	2.60695
30	835	Round	Dist1	2.4804	3.0853	1.8436	3.1709	3.4952	3.3767	.	2.90868
30	591	Round	Dist2	4.0463	2.3085	2.3594	2.7089	2.0699	2.2433	2.126	2.55176
30	355	Round	Prox1	3.2463	2.9623	3.7148	2.5381	3.1945	2.7766	.	3.0721
30	493	Round	Prox2	3.3015	2.6336	3.1892	2.7545	2.6839	2.8264	.	2.89818
30	155	Round	Right	4.9236	2.5435	3.0508	2.4409	2.5861	2.0823	2.5636	2.8844
31	160	Loin	1	2.1718	1.1723	2.5213	2.0481	2.0825	3.2974	.	2.21557
31	247	Loin	2	5.6361	4.453	5.7082	6.0428	4.1515	4.6006	.	5.0987
31	145	Loin	3	3.2528	3.1636	3.465	2.2768	3.2427	4.732	.	3.35548
31	756	Loin	4	4.3403	2.0329	1.4937	1.3505	3.7446	4.9622	.	2.98737
31	344	Round	Dart	4.4351	5.5031	2.4194	3.7453	3.154	4.662	.	3.98648
31	917	Round	Dist1	4.0921	5.4725	2.9077	2.7178	2.6581	3.3744	.	3.5371
31	606	Round	Dist2	3.0117	3.4011	2.6311	2.2597	2.2424	2.3197	3.3332	2.7427
31	284	Round	Prox1	3.1165	4.1028	5.9035	6.2669	2.7618	2.599	3.0313	3.96883
31	682	Round	Prox2	2.1786	4.1721	3.7672	2.3941	3.7608	3.2911	.	3.26065
31	538	Round	Right	8.1733	6.0229	3.9402	1.9101	2.2626	2.7342	.	4.17388
32	583	Loin	1	1.5286	2.1192	2.0188	2.5438	2.2429	2.6737	.	2.18783
32	989	Loin	2	1.7238	1.6148	3.1389	1.5268	1.7313	2.2907	.	2.00438
32	902	Loin	3	2.579	2.4419	2.56	3.1164	2.2801	2.792	.	2.62823
32	789	Loin	4	1.5815	1.972	1.4746	1.4691	1.6225	1.0748	.	1.53242
32	867	Round	Dart	4.4143	3.6316	2.8691	1.841	2.8665	3.6356	.	3.20968
32	436	Round	Dist1	3.0746	3.0031	2.6207	2.86	4.9588	5.9465	.	3.74395
32	271	Round	Dist2	3.7462	3.3225	2.9936	2.5179	4.2122	4.5871	4.5792	3.70839
32	335	Round	Prox1	5.0925	2.2716	3.6337	2.4641	4.2301	3.3591	.	3.50852
32	454	Round	Prox2	2.643	4.4438	2.6201	2.8263	3.3586	4.0455	.	3.32288
32	751	Round	Right	2.854	2.9178	2.9729	3.3163	3.7398	4.9768	4.6029	3.62579
33	485	Loin	1	2.2343	2.2822	2.4298	2.2066	4.0454	1.9393	.	2.52293
33	801	Loin	2	3.1229	3.7929	3.6941	2.6987	4.1771	2.0677	.	3.2589
33	553	Loin	3	1.6339	3.6109	3.2607	2.3008	2.248	4.4374	.	2.91528
33	212	Loin	4	2.5647	3.7099	2.2046	2.6906	2.8475	2.0335	.	2.67513
33	749	Round	Dart	6.5606	3.9535	3.2067	2.8121	2.7877	6.2366	.	4.25953
33	546	Round	Dist1	4.1067	1.962	4.4484	1.6771	3.9356	4.5965	.	3.45438
33	508	Round	Dist2	2.6688	2.7638	2.1484	3.6695	6.3334	3.8371	.	3.57017
33	119	Round	Prox1	3.5965	5.5557	1.8154	2.65	3.0968	5.1057	.	3.63668
33	120	Round	Prox2	2.7566	2.6997	1.7644	2.0581	4.0514	5.2628	.	3.09883
33	605	Round	Right	4.741	3.3104	3.1788	2.2174	2.9675	4.0015	2.3573	3.25341
34	648	Loin	1	7.4557	3.9298	3.3703	4.7199	6.3576	3.4836	.	4.88615
34	857	Loin	2	1.7103	2.1917	3.1035	1.5755	1.8209	3.1556	.	2.25958
34	121	Loin	4	2.2936	2.9669	2.6864	2.5208	2.5394	2.2213	.	2.53807
34	826	Loin	D14	1.9109	2.112	1.6726	3.3408	2.2861	1.8209	.	2.19055
34	646	Round	Dart	3.4444	1.8757	3.0412	2.8581	6.6527	2.7679	.	3.44
34	679	Round	Dist1	3.5429	2.3085	1.9489	2.6235	2.6694	1.2684	.	2.3936
34	191	Round	Dist2	2.6762	2.5599	2.5616	2.3551	2.8766	2.1515	.	2.53015
34	435	Round	Prox1	1.5763	3.3999	3.4711	2.4713	3.3306	3.0615	.	2.88512
34	626	Round	Prox2	1.8617	1.5137	4.2187	2.5466	2.8448	2.0673	.	2.5088
34	729	Round	Right	3.5643	2.2894	3.1626	2.747	2.9763	3.1466	3.5303	3.0595
35	990	Loin	1	3.3653	3.6519	3.901	2.37	3.2167	3.9768	.	3.41362
35	204	Loin	2	3.1716	3.0073	3.2142	3.2089	3.9236	4.3423	.	3.47798
35	415	Loin	3	2.8624	2.9245	2.3118	2.6922	2.7636	2.0245	.	2.5965
35	289	Loin	4	1.924	2.5171	3.3037	2.3727	1.8028	1.8133	.	2.28893
35	472	Round	Dart	3.3428	2.2079	3.599	2.799	3.9924	3.1629	.	3.184
35	453	Round	Dist1	3.1619	3.9734	5.1981	3.1161	3.5345	2.7199	.	3.61732
35	805	Round	Dist1	3.1759	3.094	3.5904	2.7179	2.0299	1.9806	.	2.76478
35	183	Round	Prox1	3.9949	2.6865	3.3498	3.2466	2.8289	2.8326	.	3.15655
35	175	Round	Prox2	2.2592	3.7265	3.0715	.	2.3845	6.0146	.	3.49126
35	443	Round	Right	4.0031	4.1232	2.2418	2.7307	3.1977	4.7799	.	3.51273
36	806	Loin	1	1.9022	2.7604	2.3246	2.3547	2.9176	2.5367	.	2.46603
36	424	Loin	2	2.4824	3.4628	2.5997	3.076	3.3917	2.229	.	2.8736
36	771	Loin	3	1.4384	1.8649	2.7524	1.1779	1.1751	2.2153	.	1.77067
36	501	Loin	4	3.2151	1.7444	1.7708	1.5314	2.5386	2.5946	.	2.23248
36	394	Round	Dart	2.8903	4.0735	3.1957	2.17	3.1147	3.0201	.	3.07738
36	176	Round	Dist1	3.6391	2.8578	2.5536	1.8131	2.8681	2.3122	2.2842	2.6183
36	637	Round	Dist2	3.5968	2.2724	1.7254	1.7875	2.1229	1.3936	.	2.14977
36	568	Round	Prox1	2.4238	3.795	2.241	2.279	3.2564	2.9496	.	2.82413
36	144	Round	Prox2	2.6841	3.0632	3.4838	2.1664	4.3993	2.7034	.	3.08337
36	310	Round	Right	4.0724	1.8371	1.8493	1.1546	1.6927	2.5105	2.8763	2.2847
37	613	Loin	1	2.1652	3.2328	3.169	3.3944	2.5053	2.5541	.	2.8368
37	483	Loin	2	1.8875	1.7686	1.7077	2.5154	1.7787	2.2383	.	1.9827
37	136	Loin	3	4.2178	2.7409	4.1869	2.988	4.1811	2.6293	.	3.49067
37	236	Loin	4	2.469	1.5889	1.8975	2.3921	1.9155	1.7163	.	1.99655
37	914	Round	Dart	3.3084	2.7604	3.1417	3.2563	2.699	2.3681	3.6903	3.03203
37	362	Round	Dist1	3.4865	4.4287	2.9188	2.1343	3.2573	3.5058	3.2123	3.27767
37	890	Round	Dist2	2.9098	2.7768	2.3055	1.9758	3.076	3.1715	2.548	2.68049
37	796	Round	Prox1	5.3052	6.5208	3.5214	3.3014	1.4226	1.8654	2.486	3.48897
37	597	Round	Prox2	2.3936	3.9782	4.2949	4.1195	2.6702	2.159	3.4453	3.29439
37	589	Round	Right	3.0898	2.7268	3.5702	2.8794	3.2148	2.813	2.7132	3.00103
38	427	Loin	1	2.1878	2.2045	1.3367	1.766	2.1655	1.6505	.	1.88517
38	182	Loin	2	1.8191	1.6992	1.9604	2.2687	1.8177	1.7953	.	1.8934
38	199	Loin	3	2.3966	3.2264	2.6724	4.3263	2.0867	2.2546	.	2.82717
38	532	Loin	4	3.4506	4.4153	3.835	4.0218	2.8321	5.441	.	3.9993
38	509	Round	Dart	2.0348	1.6692	2.019	2.5429	1.7049	1.9799	2.0645	2.00217
38	545	Round	Dist1	2.0306	2.6606	2.143	2.8783	1.6526	2.3612	3.6317	2.47971
38	463	Round	Dist2	3.0969	2.341	1.9469	2.7054	2.6183	2.6388	3.1716	2.64556
38	560	Round	Prox1	2.3227	5.3507	2.5651	2.1986	2.238	3.1298	2.896	2.95727
38	878	Round	Prox2	2.4524	2.2464	1.6241	1.9582	2.3337	2.0993	2.0645	2.11123
38	780	Round	Right	3.2117	1.9602	1.4964	2.067	1.6854	1.8113	.	2.03867
