# Supplementary material for: Effects of delivery via pressure-adjustable pneumatic gas-powered dart gun of three antimicrobial drugs (ceftiofur crystalline free acid, tildopirosin, and tulathromycin) on drug disposition and meat quality in cattle
Source: PeerJ. 2021 Aug 4;9:e11822. doi: 10.7717/peerj.11822 (PMC8349169; doi:10.7717/peerj.11822)
Supplement: Supplemental Information 3 — “Cef data” are serum concentrations after administration of ceftiofur crystalline free acid; “tildo data” are serum concentrations after administration of tildopirosin; and “tulath data” are serum concentrations after administration of tulathromycin as described in the article. [file peerj-09-11822-s003.xlsx]

## Sheet: cef data
	645	638	608	599	680	1	2	3	AVERAGE	SD	AVE w/o 1,2,3
0	1.7464	0.8786	0.3809	3.686	1.758	0	0	0	1.05624	1.29389	1.68998	1.26134
4	114.223	241.06	9.2797	33.5176	16.5041	4.8322	11.5481	11.4211	55.2981	83.2059	82.9167	97.8041
8	237.643	228.265	15.6377	155.356	174.173	27.3233	0	16.1727	106.821	102.132	162.215	89.0604
24	52.108	160.48	9.9326	38.8159	19.5851	134.41	17.0749	40.9265	59.1666	56.6758	56.1844	60.5695
48	2.572	1.8422	0.6488	6.9278	2.8161	16.2138	2.977	17.6119	6.4512	6.71182	2.96138	2.37201
72	1.6704	5.3015	1.2064	0.8092	1.5653	23.3642	4.3836	10.0405	6.04264	7.64631	2.11056	1.8155
144	0.5838	0.6567	4.7375	15.4555	3.0074	1.814	0.9351	0	3.39875	5.11141	4.88818	6.15754
240	1.888	0.8688	0.7034	2.524	0.9766	2.9369	0	4.7777	1.83442	1.54316	1.39216	0.782289

## Sheet: tildo data
	555	582	594	634	640	682			Without 682
0	0.78	7.31	0	0	1.45	0.29	1.63833	2.83289	1.908	3.07996
4	69.09	41.56	271.27	346.07	366.63	162.53	209.525	139.486	218.924	153.811
8	365.93	310.39	354.19	330.71	424.12	404.97	365.052	43.2863	357.068	43.1751
24	205.91	186.6	241.66	70.57	252.52	320.58	212.973	83.6543	191.452	72.6209
48	233.1	214.4	167.23	129.91	243.51	206.72	199.145	42.9496	197.63	47.8395
72	27.98	165.18	70.08	9.09	241.6	146.92	110.142	89.6996	102.786	98.2432
144	26	177.45	105.63	31.99	178.61	170.02	114.95	71.9345	103.936	74.5547
240	44.77	44.86	16.35	15.99	43.35	145.1	51.7367	47.7764	33.064	15.4342

## Sheet: tulath data
	569	637	646	670	671	672
0	13.7	16.7	94.8	33.7	12.6	13.3	30.8	32.3516
4	544.3	797.3	314.1	676.5	413.5	49.9	465.933	268.019
8	176.9	449.4	316.8	771.4	421.1	109	374.1	235.871
24	435.4	198.7	527.6	1221.3	313.1	59	459.183	408.756
48	117.7	687.4	618	1166		32.8	524.38	462.076
72	133.7	123.4	365.5	724.1	230.5	36.9	269.017	249.514
144	220.4	404	440.1	806.6	240.4	26	356.25	265.732
240	18.6	64.5	100.5	434.7	62.4	13.9	115.767	159.528
